# Metabolic retroconversion of trimethylamine *N*-oxide and the gut microbiota

Lesley Hoyles<sup>1\*</sup>, Maria L. Jiménez-Pranteda<sup>2\*</sup>, Julien Chilloux<sup>1\*</sup>, Francois Brial<sup>3</sup>, Antonis Myridakis<sup>1</sup>, Thomas Aranas<sup>3</sup>, Christophe Magnan<sup>4</sup>, Glenn R. Gibson<sup>2</sup>, Jeremy D. Sanderson<sup>5</sup>, Jeremy K. Nicholson<sup>1</sup>, Dominique Gauguier<sup>1,3</sup>, Anne L. McCartney<sup>2†</sup> and Marc-Emmanuel Dumas<sup>1†</sup>

<sup>1</sup>Integrative Systems Medicine and Digestive Disease, Department of Surgery and Cancer, Faculty of Medicine, Imperial College London, Exhibition Road, London SW7 2AZ, UK

<sup>2</sup>Food Microbial Sciences Unit, Department of Food and Nutritional Sciences, School of Chemistry, Food and Pharmacy, Faculty of Life Sciences, The University of Reading, Whiteknights Campus, Reading RG6 6UR, UK

<sup>3</sup>Sorbonne Universities, University Pierre & Marie Curie, University Paris Descartes, Sorbonne Paris Cité, INSERM UMR\_S 1138, Cordeliers Research Centre, Paris, France

<sup>4</sup>Sorbonne Paris Cité, Université Denis Diderot, Unité de Biologie Fonctionnelle et Adaptative, CNRS UMR 8251, 75205 Paris, France

<sup>5</sup>Department of Gastroenterology, Guy's and St Thomas' NHS Foundation Trust and King's College London, London, UK

\*These authors made equal contributions to this work; shared first authorship.

†Corresponding authors: Anne L. McCartney, [a.l.mccartney@reading.ac.uk](mailto:a.l.mccartney@reading.ac.uk); Marc-Emmanuel Dumas, [m.dumas@imperial.ac.uk](mailto:m.dumas@imperial.ac.uk)

**Running title:** Reduction of TMAO by the human gut microbiota

**Abbreviations:** AUC, area under the curve; DMA, dimethylamine; FISH, fluorescence *in situ* hybridization; FMO, flavin mono-oxygenase; MMA, monomethylamine; PC, phosphatidylcholine; TMA, trimethylamine; TMAO, trimethylamine *N*-oxide; UPLC–MS/MS, ultra-performance liquid chromatography–tandem mass spectrometry.

**Keywords:** co-metabolic axis; gut–liver axis; metabolomics; *Enterobacteriaceae*; lactic acid bacteria.

## ABSTRACT

The dietary methylamines choline, carnitine and phosphatidylcholine are used by the gut microbiota to produce a range of metabolites, including trimethylamine (TMA). However, little is known about the use of trimethylamine *N*-oxide (TMAO) by this consortium of microbes. A feeding study using deuterated TMAO in C57BL6/J mice demonstrated microbial conversion of TMAO to TMA, with uptake of TMA into the bloodstream and its conversion to TMAO. Antibiotic-treated mice lacked microbial activity necessary to convert TMAO to TMA, with deuterated TMAO being taken up directly into the bloodstream. In batch-culture fermentation systems inoculated with human faeces, growth of *Enterobacteriaceae* was stimulated in the presence of TMAO. Human-derived faecal and caecal bacteria ( $n = 66$  isolates) were screened on solid and liquid media for their ability to use TMAO, with metabolites in spent media analysed by  $^1\text{H}$ -NMR. As with the *in vitro* fermentation experiments, TMAO stimulated the growth of *Enterobacteriaceae*; these bacteria produced most TMA from TMAO. Caecal/small intestinal isolates of *Escherichia coli* produced more TMA from TMAO than their faecal counterparts. Lactic acid bacteria produced increased amounts of lactate when grown in the presence of TMAO, but did not produce large amounts of TMA. In summary, TMA can be produced by the gut microbiota (predominantly *Enterobacteriaceae*) from TMAO. This TMA is then taken up by the host and converted back to TMAO. That is, metabolic retroconversion occurs. In addition, TMAO influences microbial metabolism depending on isolation source and taxon of gut bacterium.

## INTRODUCTION

Dietary methylamines such as choline, trimethylamine *N*-oxide (TMAO), phosphatidylcholine (PC) and carnitine are present in a number of foodstuffs, including meat, fish, nuts and eggs. It has long been known that gut bacteria are able to use choline in a fermentation-like process, with trimethylamine (TMA), ethanol, acetate and ATP among the known main end-products (Wünsche, 1940; Bradbeer, 1965; Zeisel *et al.*, 1983). TMA can be used by members of the order *Methanomassiliicoccales* (*Archaea*) present in the human gut to produce methane (Borrel *et al.*, 2017), or taken up by the host. Microbially produced TMA derived from PC is absorbed in the small intestine (Stremmel *et al.*, 2017). TMA diffuses into the bloodstream from the intestine via the hepatic vein to hepatocytes, where it is converted to trimethylamine *N*-oxide (TMAO) by hepatic flavin-containing mono-oxygenases (FMOs; Bennett *et al.*, 2013). The bulk of TMAO, and lesser amounts of TMA, derived from dietary methylamines can be detected in urine within 6 h of ingestion, and both compounds are excreted in urine but not faeces (de la Hueraga and Popper, 1951; Taesuwan *et al.*, 2017). TMAO can also be detected in human skeletal muscle within 6 h of an oral dose of TMAO (Taesuwan *et al.*, 2017).

TMAO present in urine and plasma is considered a biomarker for non-alcoholic fatty liver disease (NAFLD), insulin resistance and cardiovascular disease (Dumas *et al.*, 2006; Spencer *et al.*, 2011; Tang *et al.*, 2013; Dumas *et al.*, 2017). Feeding TMAO to high-fat-fed C57BL/6 mice exacerbates impaired glucose tolerance, though the effect on the gut microbiota is unknown (Gao *et al.*, 2014). Low plasma PC and high urinary methylamines (including TMAO) were observed in insulin-resistant mice on a high-fat diet, suggesting microbial methylamine metabolism directly influences choline bioavailability (Dumas *et al.*, 2006), and choline bioavailability is known to contribute to hepatic steatosis in patients (Spencer *et al.*, 2011). High levels of circulating TMAO are associated with cardiovascular disease (Tang *et al.*, 2013). However, circulating TMAO has been suggested to play a role in protection from hyperammonemia, acting as an osmoprotectant, and from glutamate neurotoxicity (Kloiber *et al.*, 1988; Miñana *et al.*, 1996). Recently, chronic exposure to TMAO has been shown to attenuate diet-associated impaired glucose tolerance in mice, and reduce endoplasmic reticulum stress and adipogenesis in adipocytes (Dumas *et al.*, 2017). There is a basal

level of TMA and TMAO detected in human urine even in the absence of dietary supplementation (de la Hueraga *et al.*, 1953), suggesting use of (microbial and/or host) cell-derived choline or PC in the intestinal tract by the gut microbiota.

While it is well established that choline (Zeisel *et al.*, 1983; Wang *et al.*, 2011; Spencer *et al.*, 2011), PC (Zeisel *et al.*, 1983; Tang *et al.*, 2013) and carnitine (Rebouche *et al.*, 1984; Seim *et al.*, 1985; Rebouche and Chenard, 1991; Koeth *et al.*, 2013) are used by the human and rodent gut microbiotas to produce TMA, little is known about the reduction of TMAO (predominantly from fish) to TMA (or other compounds) by members of these consortia. TMAO is found at concentrations of 20–120 mg per 100 g fish fillet (Jebsen and Riaz, 1977). Ingestion of fish by humans leads to increased urinary excretion of dimethylamine (DMA) and TMA, from 5.6 to 24.1 and from 0.2 to 1.6  $\mu\text{mol}/24 \text{ h/kg}$  of body weight, respectively (Zeisel and Da Costa, 1986). Individuals with trimethylaminuria (fish odour syndrome), in which TMA is not detoxified to TMAO by hepatic FMOs, have been shown to reduce 40–60 % of an oral dose of TMAO to TMA (al-Waiz *et al.*, 1987). It was suggested the gut microbiota was responsible for reducing TMAO in these individuals, and in those individuals without trimethylaminuria the TMA was re-oxidized in the liver before being excreted in the urine. The process was termed ‘*metabolic retroversion*’ “(i.e., a cycle of reductive followed by oxidative reactions to regenerate TMAO)” (al-Waiz *et al.*, 1987). The reduction of TMAO to TMA is most commonly associated with the gut microbiota of marine fish, with the TMA generated by these bacteria contributing to the characteristic odour of rotting fish (Barrett and Kwan, 1985). Members of the class *Gammaproteobacteria*, which includes a number of food spoilage organisms, are known to reduce TMAO to TMA quantitatively and are unable to reduce TMA further (Takagi and Ishimoto, 1983; Barrett and Kwan, 1985). The conversion of TMAO to TMA by bacteria represents a unique form of anaerobic respiration, in which TMAO reductase acts as a terminal electron acceptor (from NADH or formate) for respiratory electron flow (Takagi and Ishimoto, 1983).

Mining of metagenomic data (*torA*) suggests *Proteobacteria* (particularly *Escherichia* and *Klebsiella* spp.) are likely to contribute greatest to the production of TMA from TMAO in the human gut via the TMAO reductase pathway, with *Actinobacteria* (*Eggerthellaceae*) becoming more important under stress (Jameson *et al.*, 2016). Other microbial genes are associated with production of

TMA from choline (*cutC*), glycine-betaine (*grdH*), L-carnitine (*cntA*) and  $\gamma$ -butyrobetaine (*cntA*) (Borrel *et al.*, 2017). A search of the NCBI nucleotide database with the phrase ‘TMAO reductase’ also suggests many other bacteria of human intestinal origin (namely, *Salmonella*, *Helicobacter*, *Prevotella*, *Bacillus* and *Bacteroides* spp.) should be able to reduce TMAO to TMA. However, this trait has not been examined *in vitro* for isolates of intestinal origin.

Consequently, we carried out an *in vivo* study in mice to confirm use of TMAO by the mouse gut microbiota and to allow us to examine metabolic retroconversion of TMAO in a murine model. We then used an *in vitro* fermentation system to highlight the effect of TMAO on the human faecal microbiota. Finally, we screened a panel of human faecal and caecal/small intestinal isolates to determine which members of the human gut microbiota were able to reduce TMAO to TMA, and whether their metabolism was affected by being grown in the presence of TMAO.

## METHODS

### Animal work

Groups of six-week-old C57BL6/J mice (Janvier Labs, Courtaboeuf, France) were received and acclimated in specific pathogen-free (SPF) maintenance conditions. They were fed with a standard chow diet (R04-40, Safe, Augy, France) and were either given free access to tap water or treated with the antibiotic cocktail (0.5 g/L vancomycin hydrochloride, 1 g/L neomycin trisulfate, 1 g/L metronidazole, 1 g/L ampicillin sodium; all antibiotics were purchased from Sigma-Aldrich) for 14 days. Mice were given in the morning by gavage either a solution of d<sub>9</sub>-TMAO at 1×10<sup>-4</sup> M (Cambridge Isotope Laboratories Inc., DLM-4779-0, UK) or saline and euthanized 6 h later by cervical dislocation. Blood samples were collected by tail tipping every 2 h in Microvette® CB 300 Lithium Heparin (Sarstedt, Marnay, France). Plasma was separated by centrifugation (10 min, 5000 g, 4 °C) and stored at -80 °C until analysed by ultra-performance liquid chromatography–tandem mass spectrometry (UPLC–MS/MS).

All procedures were authorized following review by the institutional ethics committee (Sorbonne Universities) and carried out under national license conditions.

# **UPLC–MS/MS determination of plasma TMA, d<sub>9</sub>-TMA, TMAO and d<sub>9</sub>-TMAO**

UPLC-MS/MS was employed for the determination of TMA, d<sub>9</sub>-TMA, TMAO and d<sub>9</sub>-TMAO. Samples (10 µL) were spiked with 10 µL Internal Standard solution (d<sub>9</sub>-choline and <sup>13</sup>C<sub>3</sub>/<sup>15</sup>N-TMA in water; 1 mg/L, Sigma-Aldrich). Ethyl 2-bromoacetate solution (45 µL) (15 g/L ethyl 2-bromoacetate, 1 % NH<sub>4</sub>OH in acetonitrile; ChromaSolv grade, Sigma-Aldrich) was added and derivatization of TMAs (TMA, d<sub>9</sub>-TMA and <sup>13</sup>C<sub>3</sub>/<sup>15</sup>N-TMA) to their ethoxy-analogues was completed after 30 min at room temperature. Protein/lipid precipitation solution (935 µL) (94 % acetonitrile/5 %water/1 % formic acid; ChromaSolv grade, Sigma-Aldrich) was added, samples were centrifuged (20 min, 20,000 g, 4 °C) and were transferred to UPLC-autosampler vials. Sample injections (5 µL loop) were performed with a Waters Acquity UPLC-Xevo TQ-S UPLC-MS/MS system equipped with an Acquity BEH HILIC (2.1×100 mm, 1.7 µm) chromatographic column. An isocratic elution was applied with 10 mM ammonium formate (Sigma-Aldrich) in 95:5 (v/v) acetonitrile:water for 7 min at 750 µL/min and 50 °C. Positive electrospray (ESI+) was used as ionization source and mass spectrometer parameters were set as follows: capillary, cone and sources voltages at -700, -18 and 50 V, respectively, desolvation temperature at 600 °C, desolvation/cone/nebuliser gases were high purity nitrogen (BOC) at 1000 L/h, 150 L/h and 7 bar, respectively. Collision gas was high-purity argon (BOC). Mass spectrometer was operated in multiple reaction monitoring mode. The monitored transitions were the following: for TMA, +146 → +118/59 *m/z* (23/27 V); for d<sub>9</sub>-TMA, +155 → +127/68 *m/z* (21/23 V); for <sup>13</sup>C<sub>3</sub>/<sup>15</sup>N-TMA, +150 → +63/122 *m/z* (27/22 V); for TMAO, +76 → +59/58 *m/z* (12/13 V); for d<sub>9</sub>-TMAO, +85 → +68/66 *m/z* (18/20 V); and for d<sub>9</sub>-choline, +108 → +60/45 *m/z* (20/22 V). The system was controlled by MassLynx software, also used for data acquisition and analysis.

# **<sup>1</sup>H-NMR spectroscopy and data analysis**

Medium samples were randomized and centrifuged (5 min, 16000 *g*). Aliquots (50  $\mu$ L) of the supernatants were diluted in 550  $\mu$ L D<sub>2</sub>O containing 1 mM trimethylsilyl-(2,2,3,3-2H<sub>4</sub>)-1-propionate. Samples were transferred to 5 mm NMR tubes and measured on a NMR spectrometer (Bruker) operating at 600.22 MHz <sup>1</sup>H frequency as described previously (Dona *et al.*, 2014). <sup>1</sup>H-NMR spectra were pre-processed and analysed as described previously (Dumas *et al.*, 2006) using the Statistical Recoupling of Variables-algorithm (Blaise *et al.*, 2009). Structural assignment was performed as described in Dona *et al.* (2016), using in-house and publicly available databases.

### ***In vitro* fermentation systems**

Freshly voided faecal samples were obtained from three healthy human volunteers (one male and two females; age range 29–31 years), none of whom had been prescribed antibiotics 6 months prior to the study, eaten fish 3 days prior to sample collection or had any history of gastrointestinal disease. The University of Reading's Research Ethics Committee (UREC) does not require that specific ethical review and approval be given by UREC for the collection of faecal samples from healthy human volunteers to inoculate *in vitro* fermentation systems. Samples were processed immediately by diluting them 1 in 10 (w/w) in pre-reduced minimal broth and homogenizing them in a filter bag in a stomacher (Stomacher 400 Lab System; Seward) for 2 min at 'high' speed. For each donor, a batch culture vessel containing 175 mL of pre-reduced minimal broth was inoculated with 20 mL of the faecal homogenate and 5 mL of sterile H<sub>2</sub>O containing 2 g TMAO dihydrate (Sigma-Aldrich). Control vessels were inoculated with 20 mL of the faecal homogenate and 5 mL of sterile H<sub>2</sub>O. The final working volume of each batch culture vessel was 200 mL. The pH of each vessel (pH 6.5) was controlled automatically by the addition of 2 M HCl or 2 M NaOH. pH controllers were supplied by Electrolab. The contents of each vessel were stirred constantly. An anaerobic environment was maintained by constantly sparging the vessels with O<sub>2</sub>-free N<sub>2</sub>. The temperature of each vessel was maintained at 37 °C by use of a circulating waterbath connected to each fermentation vessel. The experiment was run for 9 h, with samples taken at 0, 1, 2, 3, 4, 5, 6 and 9 h.

### **Fluorescence *in situ* hybridization (FISH) analysis**

Aliquots (2× 375 µL) of sample were fixed in ice-cold 4 % paraformaldehyde for 4 h, washed in sterile phosphate-buffered saline and stored for FISH analysis as described by Martín-Peláez *et al.* (2008). **Supplementary Table 1** gives details for probes used in this study. Probes were synthesized commercially (MWG-Biotech) and labelled with the fluorescent dye cyanine 3 (Cy3; excitation λ, 514 nm; emission λ, 566 nm; fluorescence colour, orange–red). FISH was done as described by Martín-Peláez *et al.* (2008).

Slides were viewed under a Nikon E400 Eclipse microscope. DAPI slides were visualized with the aid of a DM400 filter; probe slides were visualized with the aid of a DM575 filter. Cells (between 15 and 50 per field of view) were counted for 15 fields of view, and the numbers of bacteria were determined by using the following equation:

$$DF \times ACC \times 6,732.42 \times 50 \times DF_{\text{sample}}$$

Where the DF (dilution factor) was calculated by taking into account the concentration of the original sample (375 µL to 300 µL = 0.8×). *ACC* (average cell count) was determined by counting 15 fields of view and assumes that a normal distribution was observed for the counts. The figure 6,732.42 refers to the area of the well divided by the area of the field of view.  $DF_{\text{sample}}$  refers to the dilution of sample used with a particular probe (e.g. 5× for  $t_0$  Lab158 counts). The detection limit of this method was 89,766 bacteria/mL of sample (= log<sub>10</sub> 4.95).

## Screening of bacteria for ability to reduce TMAO

Part of an in-house collection (University of Reading) of bacteria isolated from human caecal/small intestinal and faecal samples (Table 1) was screened on minimal agar [g/L: glucose (Fisher Scientific), 4; bacteriological peptone (Oxoid), 20; NaCl (Fisher Scientific), 5; neutral red (Sigma-Aldrich), 0.03; agar technical no. 3 (Oxoid), 15; pH 7] with and without 1 % (w/v) TMAO dihydrate (Sigma-Aldrich). The composition of the agar was based on that of Takagi and Ishimoto (1983), who used the medium with crystal violet and bile salts to screen members of the *Enterobacteriaceae* for TMAO reductase activity. Colonies of isolates able to ferment glucose were red, whereas those able to reduce TMAO were white. Growth curves (OD<sub>600</sub> measured hourly for 10–

12 h, then at 24 h) were determined for selected isolates grown anaerobically at 37 °C in anaerobic minimal broth [g/L: glucose, 4; bacteriological peptone, 20; NaCl, 5; L-cysteine HCl (Sigma-Aldrich), 0.5; resazurin solution (0.25 mg/mL; Sigma-Aldrich), 4 mL; pH 7] with and without 1 % (w/v) TMAO dihydrate. Glucose was substituted by raffinose (Sigma-Aldrich) (Trojanová *et al.*, 2006) in the minimal broth when working with bifidobacteria because of the poor growth of these bacteria on the glucose-based medium. pH and metabolite profiles of culture medium were examined at the end of the growth experiment (i.e. at  $t_{24}$ ).

## Statistical analyses

Differences between metabolites produced by faecal and caecal/small intestinal isolates of *Escherichia coli* and lactic acid bacteria in the presence and absence of TMAO were analysed using Student's *t* test. FISH data from the *in vitro* fermentation systems were analysed using the Kolmogorov–Smirnov test with statistical significance, after correction for multiple testing, taken at  $P < 0.05$ . Because of the presence of ties in the metabolite data from *in vitro* fermentation systems, the bootstrapped Kolmogorov–Smirnov test (10,000 replications) was used with these data. Data from *in vitro* fermentation systems (FISH and NMR) were correlated using Spearman's rank correlation (corrected for ties) with results corrected for multiple testing using the method of Benjamini and Hochberg (1995).

## RESULTS

### *In vivo* confirmation of metabolic retroconversion

First, to confirm *in vivo* metabolic retroconversion (i.e. microbial conversion of TMAO to TMA, followed by host conversion of TMA to TMAO), we administered isotopically-labelled  $d_9$ -TMAO or saline to mice that had or had not been treated with a broad-spectrum antibiotic cocktail for 14 days to suppress the gut microbiota (Tang *et al.*, 2013). Reduction of  $d_9$ -TMAO to  $d_9$ -TMA was quantified in urine by UPLC–MS/MS up to 6 h after  $d_9$ -TMAO gavage, together with unlabelled TMA and TMAO potentially produced from dietary sources (**Fig. 1**).

In the absence of antibiotics, d<sub>9</sub>-TMAO was converted to d<sub>9</sub>-TMA within 2 h of gavage. This conversion was dramatically reduced, leading to a significantly lower concentration of d<sub>9</sub>-TMA and a higher concentration of d<sub>9</sub>-TMAO, when the gut microbiota was suppressed by antibiotics (**Fig. 1A–D**). We noted that in the absence of antibiotics all animals excreted approximately three times higher levels of urinary unlabelled TMA than TMAO (**Fig. 1E–H**), corresponding to constitutively low FMO3 activity in mice (Zhang *et al.*, 2007). Levels of unlabelled TMAO/TMA were not significantly different from one another in the control and d<sub>9</sub>-TMAO-fed animals, while antibiotic treatment significantly reduced the amount of both TMAO and TMA (**Fig. 1E, F**). Bioavailability of unlabelled TMAO/TMA, as assessed by area under the curve (AUC), was significantly reduced by antibiotic treatment in both saline and d<sub>9</sub>-TMAO-gavaged animals, with almost no TMA detected in either experimental group (**Fig. 1G, H**).

### **Effect of TMAO on human gut bacteria within a mixed system**

After *in vivo* validation of the role of the gut microbiota in metabolic retroconversion, we analysed the effect of TMAO on the faecal microbiota in an anaerobic batch-culture fermentation system. Fermenter vessels filled with the glucose-containing medium supplemented or not with 1 % (w/v) TMAO were inoculated with faecal slurries from three healthy donors and monitored for 9 h. With the exception of enhanced growth of the *Enterobacteriaceae* (probe Ent), the presence of TMAO in the medium had no statistically significant effect on the growth of bacteria within the fermentation systems at 9 h (**Fig. 2A, Supplementary Figure 1**).

Huge variability, as measured by <sup>1</sup>H-NMR, was observed in the amount of TMA and DMA produced by gut bacteria in the TMAO-containing fermentation systems, with the concentrations of both metabolites increasing steadily from 0 to 9 h and differing significantly ( $P < 0.05$ ) from the control systems (**Fig. 2B**). The amount of TMAO in the systems was seen to decrease at 8 h.

Correlation of metabolite and FISH data demonstrated *Clostridium* clusters I and II (Chis150), *Enterobacteriaceae* (Ent), bifidobacteria (Bif164) and coriobacteriia (Ato291) were associated with TMA, acetate, ethanol and lactate (**Fig. 2C**). The *Betaproteobacteria* (Bet42a) were anti-correlated with TMA, acetate, ethanol and lactate, which is unsurprising given this was the only

group of bacteria whose representation decreased in the fermentation systems over the course of the experiment (**Supplementary Figure 1, Fig. 2C**). The *Enterobacteriaceae* and clostridia were positively correlated with DMA production. The lactic acid bacteria (Lab158) were not significantly correlated with any of the metabolites in the mixed culture.

## **Growth of pure cultures of gut bacteria in the presence of TMAO**

Using an in-house collection of bacteria, we initially screened isolates on a modified version of the agar of Takagi and Ishimoto (1983) as a rapid means of screening bacteria for TMAO reductase activity, and thereby their ability to reduce TMAO to TMA. While members of the *Enterobacteriaceae* produced expected results (i.e. white colonies when grown in the presence of TMAO and glucose, rather than red colonies on the glucose only control), we observed a number of unexpected outcomes depending on the species under study. For example, colonies of lactic acid bacteria were larger (almost twice their usual size) on TMAO-containing agar than on the glucose control but remained red in colour, suggesting they had not reduced TMAO to TMA at detectable levels but TMAO was influencing their growth. The clostridia examined produced mixed results on the control and TMAO-containing media (i.e. white colonies on both plates or on the control plate only, larger colonies on the TMAO-containing medium but without a colour change of the medium).

To determine whether these isolates were converting TMAO to TMA but a low level, we examined the growth of all isolates in liquid culture and metabolites in the spent medium using NMR. The growth of the *Enterobacteriaceae* was most greatly affected by the presence of TMAO in the medium, with a faster, longer-lasting exponential phase than for the same isolates grown in the control medium (**Fig. 3A**). pH of the spent medium (after 24 h) when *Enterobacteriaceae* were grown in the presence of TMAO increased from a mean of  $4.7 \pm 0.3$  (for the control) to  $7.6 \pm 0.3$  ( $n = 20$ ) (the change in pH is what causes the colonies to appear white on TMAO-containing agar). The growth of lactic acid bacteria, including *Enterococcus* and *Streptococcus* (**Fig. 3A**) spp., was enhanced in the presence of TMAO, but not to the same extent as seen for the *Enterobacteriaceae*. There was no significant difference ( $P = 0.27$ ,  $t$  test) in the pH of the spent medium for these bacteria after 24 h (mean  $4.67 \pm 0.9$  compared with  $4.33 \pm 0.27$  for the control). The growth of members of

*Clostridium* cluster I (e.g. *Clostridium perfringens*, **Fig. 3A**) was not enhanced in the presence of TMAO, though some of these bacteria changed the colour of both the control and TMAO-containing plates yellow during their growth. The pH of the spent liquid medium confirmed this observation to be due to the alkalinity of the media in the control and TMAO-containing media after 24 h incubation: e.g. *Clostridium sporogenes* D1(9) (pH 6.25 compared with 6.76 in the control medium), *Clostridium paraputrificum* L16-FAA6 (pH 6.45 vs 5.38) and *Clostridium perfringens* L20-BSM1 (pH 5.56 vs 4.64).

<sup>1</sup>H-NMR analysis of spent medium from the TMAO-containing and control samples demonstrated that, as expected, the *Enterobacteriaceae* produced the greatest amount of TMA from TMAO (mean  $38.79 \pm 11.08$  mM compared with  $0.03 \pm 0.01$  mM,  $n = 20$ ) (**Fig. 3B**; **Supplementary Table 2**). Members of the families *Peptostreptococcaceae* ( $3.72$  mM,  $n = 1$ ), *Clostridiaceae* (Cluster I) ( $2.62 \pm 1.83$  mM,  $n = 3$ ), *Porphyromonadaceae* ( $1.42$  mM,  $n = 1$ ), *Bacteroidaceae* ( $1.40 \pm 0.31$  mM,  $n = 3$ ), *Enterococcaceae* ( $1.19 \pm 0.05$  mM,  $n = 5$ ), *Erysipelotrichaceae* ( $0.94$  mM,  $n = 1$ ; [*Clostridium*] *ramosum*), *Staphylococcaceae* ( $0.34$  mM,  $n = 1$ ), *Streptococcaceae* ( $0.30 \pm 0.16$  mM,  $n = 5$ ), *Lactobacillaceae* ( $0.17 \pm 0.07$  mM,  $n = 2$ ), *Pseudomonadaceae* ( $0.12$  mM,  $n = 1$ ) and *Bifidobacteriaceae* ( $0.13 \pm 0.1$  mM,  $n = 17$ ) produced low levels of TMA from TMAO (**Fig. 3B**; **Supplementary Table 2**). There was great variability in the ability of the bifidobacteria to produce TMA from TMAO, with several isolates and [*Clostridium*] *innocuum*, *Actinomyces odontolyticus*, *Fusobacterium ulcerans* and *Actinomyces viscosus* not producing TMA from TMAO (**Fig. 3B**; **Supplementary Table 2**).

### Differences in the metabolic capabilities of faecal and caecal *Escherichia coli* isolates

Comparison of the amounts of TMA, and co-metabolites, produced by the faecal ( $n = 7$ ) and caecal ( $n = 9$ ) isolates of *Escherichia coli* demonstrated significantly higher amounts of TMA were produced by the caecal isolates compared with the faecal isolates in the TMAO-containing medium (**Fig. 3C**). *Escherichia coli* of caecal origin produced more TMA than faecal isolates of the same bacterium or other enterobacteria (*Hafnia*, *Citrobacter* and *Klebsiella* spp.) (**Supplementary Table 2**). The faecal isolates produced more acetate and lactate than the caecal isolates when grown in the

control medium. Taken together, these results demonstrate the different metabolic capabilities of isolates of *Escherichia coli* recovered from different regions of the human gut.

### **Lactic acid bacteria produce more lactate in the presence of TMAO**

Differences were also seen in the amount of lactic acid produced by lactic acid bacteria in the presence and absence of TMAO (**Fig. 3B, D**). In raffinose-containing medium, bifidobacteria produced increased amounts of lactate when grown in the presence of TMAO (the bifidobacteria grew poorly, if at all, in glucose-containing media). Unlike the bifidobacteria, the *Streptococcaceae* and *Enterococcaceae* grew well in the glucose-containing medium and produced over 25 mM lactic acid in the TMAO-containing samples compared with < 5 mM in the control samples (**Fig. 3D**). To the best of our knowledge, this is the first time TMAO has been shown to influence the metabolism of gut bacteria – specifically lactic acid bacteria – without producing appreciable amounts of TMA.

## **DISCUSSION**

TMAO is a circulating metabolite produced as a direct result of microbial degradation of dietary methylamines in the intestinal tract, and can be readily detected along with its precursor TMA in human urine, blood and skeletal muscle (Wang *et al.*, 2011; Koeth *et al.*, 2013; Tang *et al.*, 2013; Taesuwan *et al.*, 2017). It worsens atherosclerosis in some mouse models of cardiovascular disease, and is positively correlated with cardiovascular disease severity in humans. Beneficial effects associated with TMAO include potential protection from hyperammonia and glutamate neurotoxicity, alleviation of endoplasmic reticulum stress and improved glucose homeostasis by stimulating insulin secretion by pancreatic cells (Kloiber *et al.*, 1988; Miñana *et al.*, 1996; Dumas *et al.*, 2017).

Over many decades it has been established that choline, PC and carnitine are dietary methylamines that contribute directly to microbiome-associated circulating levels of TMAO found in humans and other animals (e.g. Zeisel *et al.*, 1983; Rebouche *et al.*, 1984; Seim *et al.*, 1985; Wang *et al.*, 2011; Koeth *et al.*, 2013; Tang *et al.*, 2013). However, TMAO itself is a water-soluble osmolyte found in high abundance in fish. Based on their observations that individuals with trimethylaminuria

could reduce an oral dose of TMAO to TMA could not detoxify it to TMAO, al-Waiz *et al.* (1987) suggested the gut microbiota could use TMAO as a substrate, and in those individuals without trimethylaminuria the TMA was re-oxidized in the liver before being excreted in the urine. This led these authors to propose the process of ‘*metabolic retroversion*’. Reference to the literature associated with fish spoilage and recent mining of metagenomic data have predicted members of the *Enterobacteriaceae* (particularly *Escherichia coli* and *Klebsiella pneumoniae*) have the potential to convert TMAO to TMA in the intestinal tract, but this has not been tested *in vitro* or *in vivo* to date (Takagi and Ishimoto, 1983; Barrett and Kwan, 1985; Jameson *et al.*, 2016; Borrel *et al.*, 2017; Taesuwan *et al.*, 2017). Consequently, we instigated this study to demonstrate metabolic retroconversion of TMAO, and to determine the effect of TMAO on the growth and metabolism of human-derived intestinal bacteria in pure and mixed cultures.

Through *in vivo* administration of deuterated TMAO to mice via oral gavage in mice, we unambiguously demonstrated that TMAO is converted to TMA, with this TMA detectable in plasma within 2 h of administration. This conversion was highly dependent on the gut microbiota, as conversion of TMAO to TMA was dramatically reduced when the microbiota was suppressed by treatment of animals with broad-spectrum antibiotics. Even in the presence of antibiotics, there was low-level conversion of TMAO to TMA, suggesting a subpopulation of the microbiota was resistant to the antibiotics used in our experiment. However, administration of a broad-spectrum antibiotic cocktail for 14 days has been demonstrated to be an effective means of suppressing the gut microbiota in studies associated with gut microbial use of dietary methylamines (Tang *et al.*, 2013).

Our *in vivo* experiment clearly demonstrates the gut microbiota converts TMAO to TMA, and that this TMA is re-oxidized to TMAO, in line with the process of ‘*metabolic retroversion*’ defined by al-Waiz *et al.* (1987). Gut-associated microbial conversion of the majority of TMAO to TMA is at odds with the findings of Taesuwan *et al.* (2017), who suggested TMAO is taken up intact and not metabolised by the gut microbiota of humans. The ratio of TMAO-to-TMA is around 10:1 in humans and 1:10 in mice, meaning TMAO was *N*-oxidized before Taesuwan *et al.* (2017) were able to observe it in circulating blood of their human subjects. In a human system with high FMO3 activity, O<sup>17</sup>-labelled TMAO would need to be used in any study evaluating O turnover to allow calculation of

the true rate of retroconversion.

Having conducted our *in vivo* experiment in mice, we examined the ability of a range of human-derived gut bacteria to convert TMAO to TMA. In the mixed microbiota system and in pure cultures, the growth of the *Enterobacteriaceae* – the main TMA-producers – was quickly affected by the presence of TMAO. This is likely to happen in the human gut also. Consequently, we believe dietary TMAO undergoes metabolic retroconversion in mammals, with the TMA produced as a result of bacterial activity in the gut available to the host for conversion back to TMAO by FMOs in hepatocytes. It should be noted that Taesuwan *et al.* (2017) did not suppress or monitor the intestinal/faecal microbiota when they administered isotopically labeled TMAO to humans, nor did they measure d<sub>9</sub>-TMA and d<sub>9</sub>-TMAO in the portal vein, bypassing subsequent hepatic *N*-oxidation of d<sub>9</sub>-TMA, so it is not possible to interpret their results in the context of presence/absence of microbial activity.

Of note is the finding that caecal isolates of enterobacteria produce more TMA from TMAO than faecal isolates of the same bacterium. The speed with which TMAO was reduced to TMA by the *Enterobacteriaceae* in the present study suggests bacterial conversion of TMAO to TMA takes place in the small intestine/proximal colon of humans and small intestine/caecum of mice. It is, therefore, unsurprising that caecal bacteria – representing the microbiota present at the intersection of the small and large intestine – are metabolically more active than their faecal counterparts with respect to TMAO metabolism. This finding is relevant to functional studies of the gut microbiota where gene annotations are based largely on faecal isolates, whose functionalities may be greatly different from those of bacteria in other regions of the human intestinal tract. It has already been demonstrated that the microbiota of the small intestine is enriched for functions associated with rapid uptake and fermentation of simple carbohydrates compared with the faecal microbiota, and that streptococci isolated from this niche are functionally very different from the same bacteria isolated from different habitats (Zoetendal *et al.*, 2012; van den Bogert *et al.*, 2013). It is, therefore, important we characterize the functions and genomes of bacteria isolated from all regions of the intestinal tract, not just those of faecal bacteria, to gain a true picture of how microbial activity influences host health.

*Enterobacteriaceae* made the greatest contribution to the conversion of TMAO to TMA, both

in pure culture and in a mixed microbiota. These Gram-negative bacteria are a source of the virulence factor lipopolysaccharide (LPS), which is associated with low-grade inflammation in high-fat-fed mice and elevated plasma levels that define metabolic endotoxaemia (Cani *et al.*, 2007, 2008). High-fat feeding has been shown to increase the representation of *Enterobacteriaceae* in the caecal microbiota of obesity-prone Sprague–Dawley rats (de La Serre *et al.*, 2010), though this mode of feeding is known to modulate the microbiota of mice independent of obesity (Hildebrandt *et al.*, 2009). Non-LPS-associated virulence of *Enterobacteriaceae*, *Vibrio cholerae* and *Helicobacter pylori* is increased when these bacteria are grown anaerobically or microaerophilically in the presence of as little as 5–10 mM TMAO (Ando *et al.*, 2007; Lee *et al.*, 2012; Paiva *et al.*, 2009; Wu *et al.*, 2017), and may be an additional means by which the gut microbiota contributes to cardiovascular and other diseases in which increased representation of *Gammaproteobacteria* is observed. This warrants attention in future animal studies.

Lactic acid bacteria clearly grow better in the presence of TMAO. The relatively high concentration (1 %) of TMAO used in this study may have contributed to this improved growth, as TMAO is an osmolyte that stabilizes proteins. Future work will involve growing lactic acid bacteria in a range of TMAO concentrations to determine how this compound affects their growth and gene expression, and comparing faecal and caecal isolates. Similar to the *Enterobacteriaceae*, a large number of these bacteria are facultative anaerobes able to grow over a range of conditions, and whose representation is increased in obese, and cirrhotic patients (Le Chatelier *et al.*, 2013; Qin *et al.*, 2014). *Streptococcus* and *Enterococcus* spp. are commensal lactic acid bacteria of the gut microbiota known to modulate immune function; but little is known about their metabolic activities in mixed microbial populations (van den Bogert *et al.*, 2014). Understanding how commensal lactic acid bacteria influence the host in dysbiosis in mixed microbial communities may allow the development of approaches to modulate their activity and influence host health.

With respect to the lactic acid bacteria, it is important to note that our mixed culture work did not highlight these as being relevant to TMAO metabolism. This is unsurprising given these bacteria do not produce large quantities of TMA from TMAO. However, we have shown their metabolism is affected by presence of TMAO in growth medium, and the increased lactate they produce in its

presence may contribute to cross-feeding associated with short-chain fatty acid production (Hoyle and Wallace, 2010). It is difficult to determine relevance of correlations from mixed microbial ecosystems in the absence of isotope labelling or pure culture work: i.e. correlation does not equate with causation. As an example, three (*Clostridium* clusters I and II, bifidobacteria, coriobacteriia) of the four groups of bacteria correlated with TMA production in our fermentation study did not produce notable quantities of TMA from TMAO based on our pure culture work. Therefore, correlating microbiota and metabolite data derived from complex systems will not give a true picture of which members of microbiota contribute to specific metabolic processes, and work with pure cultures is required to supplement functional studies to increase our understanding of poorly understood microbially driven metabolic processes within the human gut.

In summary, we have demonstrated metabolic retroconversion – another example of host–microbial co-metabolism – occurs in the mammalian system with respect to TMAO, whereby TMAO is reduced by the gut microbiota to TMA and regenerated by host hepatic enzymes. We have also demonstrated that growth and metabolism of members of the gut microbiota are affected by TMAO in a source- and taxon-dependent manner, with the family *Enterobacteriaceae* making the greatest contribution to production of TMA in the gut.

## ACKNOWLEDGEMENTS

M.L.J.-P., L.H. and A.L.M. performed the microbiological work, J.C. was responsible for NMR analysis and interpretation of the NMR data, T.A., F.B. and N.P. did the animal work, M.-E.D. supervised the NMR work, A.L.M. supervised the microbiological work and D.G. supervised the animal work. All authors contributed to the writing of the manuscript. M.L.J.-P. was sponsored by Fundación Alfonso Martín Escudero (Spain). Work was supported by a grant from the EU-FP7 (METACARDIS, HEALTH-F4-2012-305312) to D.G. and M.-E.D. L.H. is in receipt of an MRC Intermediate Research Fellowship in Data Science (grant number MR/L01632X/1, UK Med-Bio).

# REFERENCES

- al-Waiz, M., Ayesh, R., Mitchell, S.C., Idle, J.R. and Smith, R.L. (1987) Disclosure of the metabolic retroversion of trimethylamine *N*-oxide in humans: a pharmacogenetic approach. *Clin Pharmacol Ther* 42, 608–612.
- Ando, H., Abe, H., Sugimoto, N. and Tobe, T. (2007) Maturation of functional type III secretion machinery by activation of anaerobic respiration in enterohaemorrhagic *Escherichia coli*. *Microbiology* 153, 464–473.
- Barrett, E.L. and Kwan, H.S. (1985) Bacterial reduction of trimethylamine oxide. *Ann Rev Microbiol* 39, 131–149.
- Benjamini, Y. and Hochberg, Y. (1995) Controlling the false discovery rate: a practical and powerful approach to multiple testing. *J R Stat Soc Ser B* 57, 289–300.
- Bennett, B.J., de Aguiar Vallim, T.Q., Wang, Z., Shih, D.M., Meng, Y., Gregory, J., Allayee, H., Lee, R., Graham, M., Crooke, R., Edwards, P.A., Hazen, S.L. and Lusis, A.J. (2013) Trimethylamine-*N*-oxide, a metabolite associated with atherosclerosis, exhibits complex genetic and dietary regulation. *Cell Metab* 17, 49–60.
- Blaise, B.J., Shintu, L., Elena, B., Emsley, L., Dumas, M.-E. and Toulhoat, P. (2009) Statistical recoupling prior to significance testing in nuclear magnetic resonance based metabonomics. *Anal Chem* 81, 6242–6251.
- Borrel, G., McCann, A., Deane, J., Neto, M.C., Lynch, D.B., Brugère, J.F. and O'Toole, P.W. (2017) Genomics and metagenomics of trimethylamine-utilizing *Archaea* in the human gut microbiome. *ISME J* 11, 2059–2074.
- Bradbeer, C. (1965) The clostridial fermentations of choline and ethanolamine. 1. Preparation and properties of cell-free extracts. *J Biol Chem* 240, 4669–4674.
- Cani, P.D., Amar, J., Iglesias, M.A., Poggi, M., Knauf, C., Bastelica, D., Neyrinck, A.M., Fava, F., Tuohy, K.M., Chabo, C., Waget, A., Delmée, E., Cousin, B., Sulpice, T., Chamontin, B., Ferrières, J., Tanti, J.F., Gibson, G.R., Casteilla, L., Delzenne, N.M., Alessi, M.C. and Burcelin, R. (2007) Metabolic endotoxemia initiates obesity and insulin resistance. *Diabetes* 56, 1761–1772.
- Cani, P.D., Bibiloni, R., Knauf, C., Waget, A., Neyrinck, A.M., Delzenne, N.M. and Burcelin, R.

(2008) Changes in gut microbiota control metabolic endotoxemia-induced inflammation in high-fat diet-induced obesity and diabetes in mice. *Diabetes* 57, 1470–1481.

Daims, H., Brühl, A., Amann, R., Schleifer, K.-H. and Wagner, M. (1999) The domain-specific probe EUB338 is insufficient for the detection of all *Bacteria*: development and evaluation of a more comprehensive probe set. *Syst Appl Microbiol* 22, 434–444.

de la Hueraga, J. and Popper, H. (1951) Urinary excretion of choline metabolites following choline administration in normals and patients with hepatobiliary diseases. *J Clin Invest* 30, 463–470.

de la Hueraga, J., Gyorgy, P., Waldstein, S., Katz, R. and Popper, H. (1953) The effects of antimicrobial agents upon choline degradation in the intestinal tract. *J Clin Invest* 32, 1117–1120.

de La Serre, C.B., Ellis, C.L., Lee, J., Hartman, A.L., Rutledge, J.C. and Raybould, H.E. (2010) Propensity to high-fat diet-induced obesity in rats is associated with changes in the gut microbiota and gut inflammation. *Am J Physiol Gastrointest Liver Physiol* 299, G440–G448.

Dona, A.C., Jiménez, B., Schäfer, H., Humpfer, E., Spraul, M., Lewis, M.R., Pearce, J.T., Holmes, E., Lindon, J.C. and Nicholson, J.K. (2014) Precision high-throughput proton NMR spectroscopy of human urine, serum, and plasma for large-scale metabolic phenotyping. *Anal Chem* 86, 9887–9894.

Dona, A.C., Kyriakides, M., Scott, F., Shephard, E.A., Varshavi, D., Veselkov, K. and Everett, J.R. (2016) A guide to the identification of metabolites in NMR-based metabonomics/metabolomics experiments. *Comput Struct Biotechnol J* 14, 135–153.

Dumas, M.-E., Barton, R.H., Toye, A., Cloarec, O., Blancher, C., Rothwell, A., Fearnside, J., Tatoud, R., Blanc, V., Lindon, J.C., Mitchell, S.C., Holmes, E., McCarthy, M.I., Scott, J., Gauguier, D. and Nicholson, J.K. (2006) Metabolic profiling reveals a contribution of gut microbiota to fatty liver phenotype in insulin-resistant mice. *Proc Natl Acad Sci U S A* 103, 12511–12516.

Dumas, M.-E., Rothwell, A.R., Hoyle, L., Aránias, T., Chilloux, J., Calderari, S., Noll, E.M., Péan, N., Boulangé, C.L., Blancher, C., Barton, R.H., Gu, Q., Fearnside, J.F., Deshayes, C., Hue, C., Scott, J., Nicholson, J.K. and Gauguier, D. (2017) Microbial-host co-metabolites are prodromal markers predicting phenotypic heterogeneity in behavior, obesity, and impaired glucose tolerance. *Cell Rep* 20, 136–148.

- Franks, A.H., Harmsen, H.J.M., Raangs, G.C., Jansen, G.J., Schut, F. and Welling, G.W. (1998) Variations of bacterial populations in human feces measured by fluorescent in situ hybridization with group specific 16S rRNA-targeted oligonucleotide probes. *Appl Environ Microbiol* 64, 3336–3345.
- Gao, X., Liu, X., Xu, J., Xue, C., Xue, Y. and Wang, Y. (2014) Dietary trimethylamine *N*-oxide exacerbates impaired glucose tolerance in mice fed a high fat diet. *J Biosci Bioeng* 118, 476–481.
- Harmsen, H.J.M., Elfferich, P., Schut, F. and Welling, G.W. (1999) A 16S rRNA-targeted probe for detection of lactobacilli and enterococci in faecal samples by fluorescent *in situ* hybridization. *Microb Ecol Health Dis* 11, 3–12.
- Harmsen, H.J.M., Raangs, G.C., He, T., Degener, J.E. and Welling, G.J. (2002) Extensive set of 16S rRNA-based probes for detection of bacteria in human feces. *Appl Environ Microbiol* 68, 2982–2990.
- Harmsen, H.J.M., Wildeboer-Veloo, A.C.M., Grijpstra, J., Knol, J., Degener, J.E. and Welling, G.W. (2000) Development of 16S rRNA-based probes for the *Coriobacterium* group and the *Atopobium* cluster and their application for enumeration of *Coriobacteriaceae* in human feces from volunteers of different ages. *Appl Environ Microbiol* 66, 4523–4527.
- Hildebrandt, M.A., Hoffmann, C., Sherrill-Mix, S.A., Keilbaugh, S.A., Hamady, M., Chen, Y.Y., Knight, R., Ahima, R.S., Bushman, F. and Wu, G.D. (2009) High-fat diet determines the composition of the murine gut microbiome independently of obesity. *Gastroenterology* 137, 1716–1724.
- Hold, G.L., Schwartz, A., Aminov, R.I., Blaut, M. and Flint, H.J. (2003) Oligonucleotide probes that detect qualitatively significant groups of butyrate-producing bacteria in human feces. *Appl Environ Microbiol* 69, 4320–4324.
- Hoyles, L. and McCartney, A.L. (2009) What do we mean when we refer to *Bacteroidetes* populations in the human gastrointestinal microbiota? *FEMS Microbiol Lett* 299, 175–183.
- Hoyles, L. and Wallace, R.J. (2010) Gastrointestinal tract: intestinal fatty acid metabolism and implications for health. In *Handbook of Hydrocarbon and Lipid Microbiology*, vol. 4, part 7, *Human-Animal-Plant Health and Physiology Consequences of Microbial Interactions with*

*Hydrocarbons and Lipids*, pp. 3120–3132. Edited by T. McGenity, K. N. Timmis, J. R. van der Meer & V. de Lorenzo. New York: Springer.

Hoyles, L., Murphy, J., Neve, H., Heller, K. J., Turton, J. F., Mahony, J., Sanderson, J. D., Hudspith, B., Gibson, G. R., McCartney, A. L. and van Sinderen, D. (2015) *Klebsiella pneumoniae* subsp. *pneumoniae*–bacteriophage combination from the caecal effluent of a healthy woman. *PeerJ* doi:10.7717/peerj.1061.

Jameson, E., Doxey, A.C., Airs, R., Purdy, K.J., Murrell, J.C. and Chen, Y. (2016) Metagenomic data-mining reveals contrasting microbial populations responsible for trimethylamine formation in human gut and marine ecosystems. *Microb Genom* 2, e000080.

Jebsen, J.W. and Riaz, M. (1977) Breakdown products of trimethylamine oxide in airdried stockfish. Means of enhancing the formation of formaldehyde and dimethylamine. *Fish Dir Skr Ser Ernoering* 1, 145–153.

Kempf, V.A., Trebesius, K. and Autenrieth, I.B. (2000) Fluorescent in situ hybridization allows rapid identification of microorganisms in blood cultures. *J Clin Microbiol* 38, 830–838.

Kloiber, O., Banjac, B. and Drewes, L.R. (1988) Protection against acute hyperammonemia: the role of quaternary amines. *Toxicology* 49, 83–90.

Koeth, R.A., Wang, Z., Levison, B.S., Buffa, J.A., Org, E., Sheehy, B.T., Britt, E.B., Fu, X., Wu, Y., Li, L., Smith, J.D., Didonato, J.A., Chen, J., Li, H., Wu, G.D., Lewis, J.D., Warrier, M., Brown, J.M., Krauss, R.M., Tang, W.H., Bushman, F.D., Lusis, A.J. and Hazen, S.L. (2013) Intestinal microbiota metabolism of L-carnitine, a nutrient in red meat, promotes atherosclerosis. *Nat Med* 19, 576–585.

Langendijk, P.S., Schut, F., Jansen, G.J., Raangs, G.W., Kamphuis, G.R., Wilkinson, M.H.F. and Welling, G.W. (1995) Quantitative fluorescent in situ hybridisation of *Bifidobacterium* spp. with genus specific 16S rRNA targeted probes and its application in fecal samples. *Appl Environ Microbiol* 61, 3069–3075.

Le Chatelier, E., Nielsen, T., Qin, J., Prifti, E., Hildebrand, F., Falony, G., Almeida, M., Arumugam, M., Batto, J.M., Kennedy, S., Leonard, P., Li, J., Burgdorf, K., Grarup, N., Jørgensen, T., Brandslund, I., Nielsen, H.B., Juncker, A.S., Bertalan, M., Levenez, F., Pons, N., Rasmussen, S.,

Sunagawa, S., Tap, J., Tims, S., Zoetendal, E.G., Brunak, S., Clément, K., Doré, J., Kleerebezem, M., Kristiansen, K., Renault, P., Sicheritz-Ponten, T., de Vos, W.M., Zucker, J.D., Raes, J., Hansen, T.; MetaHIT consortium, Bork, P., Wang, J., Ehrlich, S.D. and Pedersen, O. (2013) Richness of human gut microbiome correlates with metabolic markers. *Nature* 500, 541–546.

Lee, K.M., Park, Y., Bari, W., Yoon, M.Y., Go, J., Kim, S.C., Lee, H.I. and Yoon, S.S. (2012) Activation of cholera toxin production by anaerobic respiration of trimethylamine *N*-oxide in *Vibrio cholerae*. *J Biol Chem* 287, 39742–39752.

Lim, S.M., Jeong, J.J., Woo, K.H., Han, M.J. and Kim, D.H. (2016) *Lactobacillus sakei* OK67 ameliorates high-fat diet-induced blood glucose intolerance and obesity in mice by inhibiting gut microbiota lipopolysaccharide production and inducing colon tight junction protein expression. *Nutr Res* 36, 337–348.

Loy, A., Maixner, F., Wagner, M. and Horn, M. (2007) probeBase – an online resource for rRNA-targeted oligonucleotide probes: new features 2007. *Nucleic Acids Res* 35, D800–D804.

Manz, W., Amann, R., Ludwig, W., Wagner, M. and Schleifer, K.-H. (1992) Phylogenetic oligodeoxynucleotide probes for the major subclasses of *Proteobacteria*: problems and solutions. *Syst Appl Microbiol* 15, 593–600.

Manz, W., Amann, R., Ludwig, W., Vancanneyt, M. and Schleifer, K.H. (1996) Application of a suite of 16S rRNA-specific oligonucleotide probes designed to investigate bacteria of the phylum cytophaga-flavobacter-bacteroides in the natural environment. *Microbiology* 142, 1097–1106.

Martín-Peláez, S., Gibson, G.R., Martín-Orúe, S.M., Klinder, A., Rastall, R.A., La Ragione, R.M., Woodward, M.J. and Costabile, A. (2008) *In vitro* fermentation of carbohydrates by porcine faecal inocula and their influence on *Salmonella* Typhimurium growth in batch culture systems. *FEMS Microbiol Ecol* 66, 608–619.

Miñana, M.D., Hermenegildo, C., Llsansola, M., Montoliu, C., Grisolia, S. and Felipo, V. (1996) Carnitine and choline derivatives containing a trimethylamine group prevent ammonia toxicity in mice and glutamate toxicity in primary cultures of neurons. *J Pharmacol Exp Ther* 279, 194–199.

Paiva, J.B., Penha Filho, R.A., Pereira, E.A., Lemos, M.V., Barrow, P.A., Lovell, M.A. and Berchieri, A. Jr (2009) The contribution of genes required for anaerobic respiration to the virulence of *Salmonella enterica* serovar Gallinarum for chickens. *Braz J Microbiol* 40, 994–1001.

Phetcharaburanin, J., Lees, H., Marchesi, J.R., Nicholson, J.K., Holmes, E., Seyfried, F. and Li, J.V. (2016) Systemic characterization of an obese phenotype in the Zucker rat model defining metabolic axes of energy metabolism and host–microbial interactions. *J Proteome Res* 15, 1897–1906.

Qin, N., Yang, F., Li, A., Prifti, E., Chen, Y., Shao, L., Guo, J., Le Chatelier, E., Yao, J., Wu, L., Zhou, J., Ni, S., Liu, L., Pons, N., Batto, J.M., Kennedy, S.P., Leonard, P., Yuan, C., Ding, W., Chen, Y., Hu, X., Zheng, B., Qian, G., Xu, W., Ehrlich, S.D., Zheng, S. and Li, L. (2014) Alterations of the human gut microbiome in liver cirrhosis. *Nature* 513, 59–64.

Rebouche, C.J. and Chenard, C.A. (1991) Metabolic fate of dietary carnitine in human adults: identification and quantification of urinary and fecal metabolites. *J Nutr* 121, 539–546.

Rebouche, C.J., Mack, D.L. and Edmonson, P.F. (1984) L-Carnitine dissimilation in the gastrointestinal tract of the rat. *Biochemistry* 23, 6422–6426.

Roger, L.C., Costabile, A., Holland, D.T., Hoyles, L. and McCartney, A.L. (2010) Examination of faecal *Bifidobacterium* populations in breast- and formula-fed infants during the first 18 months of life. *Microbiology* 156, 3329–3341.

Seim, H., Schulze, J. and Strack, E. (1985) Catabolic pathways for high-dosed L(-)- or D(+)-carnitine in germ-free rats? *Biol Chem Hoppe Seyler* 366, 1017–1021.

Spencer, M.D., Hamp, T.J., Reid, R.W., Fischer, L.M., Zeisel, S.H. and Fodor, A.A. (2011) Association between composition of the human gastrointestinal microbiome and development of fatty liver with choline deficiency. *Gastroenterology* 140, 976–986.

Stremmel, W., Schmidt, K.V., Schuhmann, V., Kratzer, F., Garbade, S.F., Langhans, C.D., Fricker, G. and Okun J.G. (2017) Blood trimethylamine-N-oxide originates from microbiota mediated breakdown of phosphatidylcholine and absorption from small intestine. *PLoS One* 12, e0170742.

Taesuwan, S., Cho, C.E., Malysheva, O.V., Bender, E., King, J.H., Yan, J., Thalacker-Mercer, A.E. and Caudill, M.A. (2017) The metabolic fate of isotopically labeled trimethylamine-N-oxide (TMAO) in humans. *J Nutr Biochem* 45, 77–82.

- 630 Takagi, M. and Ishimoto, M. (1983) *Escherichia coli* mutants defective in trimethylamine *N*-oxide
- 631 reductase. *FEMS Microbiol Lett* 17, 247–250.
- 632 Tang, W.H., Wang, Z., Levison, B.S., Koeth, R.A., Britt, E.B., Fu, X., Wu, Y. and Hazen, S.L. (2013)
- 633 Intestinal microbial metabolism of phosphatidylcholine and cardiovascular risk. *N Engl J Med* 368,
- 634 1575–1584.
- 635 Thorasin, T., Hoyles, L. and McCartney, A.L. (2015) Dynamics and diversity of the '*Atopobium*
- 636 cluster' in the human faecal microbiota, and phenotypic characterization of '*Atopobium* cluster'
- 637 isolates. *Microbiology* 161, 565–579.
- 638 Trojanová, I., Vlková, E., Rada, V. and Marounek, M. (2006) Different utilization of glucose and
- 639 raffinose in *Bifidobacterium breve* and *Bifidobacterium animalis*. *Folia Microbiol (Praha)* 51, 320–
- 640 324.
- 641 van den Bogert, B., Boekhorst, J., Herrmann, R., Smid, E.J., Zoetendal, E.G. and Kleerebezem, M.
- 642 (2013) Comparative genomics analysis of *Streptococcus* isolates from the human small intestine
- 643 reveals their adaptation to a highly dynamic ecosystem. *PLoS One* 8, e83418.
- 644 van den Bogert, B., Meijerink, M., Zoetendal, E.G., Wells, J.M. and Kleerebezem, M. (2014)
- 645 Immunomodulatory properties of *Streptococcus* and *Veillonella* isolates from the human small
- 646 intestine microbiota. *PLoS One* 9, e114277.
- 647 Walker, A.W., Duncan, S.H., McWilliam Leitch, E.C., Child, M.W. and Flint, H.J. (2005) pH and
- 648 peptide supply can radically alter bacterial populations and short-chain fatty acid ratios within
- 649 microbial communities from the human colon. *Appl Environ Microbiol* 71, 3692–3700.
- 650 Wang, Z., Klipfell, E., Bennett, B.J., Koeth, R., Levison, B.S., Dugar, B., Feldstein, A.E., Britt, E.B.,
- 651 Fu, X., Chung, Y.M., Wu, Y., Schauer, P., Smith, J.D., Allayee, H., Tang, W.H., DiDonato, J.A.,
- 652 Lusis, A.J. and Hazen, S.L. (2011) Gut flora metabolism of phosphatidylcholine promotes
- 653 cardiovascular disease. *Nature* 472, 57–63.
- 654 Wu, D., Cao, M., Peng, J., Li, N., Yi, S., Song, L., Wang, X., Zhang, M. and Zhao, J. (2017) The
- 655 effect of trimethylamine *N*-oxide on *Helicobacter pylori*-induced changes of immunoinflammatory
- 656 genes expression in gastric epithelial cells. *Int Immunopharmacol* 43, 172–178.

657 Wünsche, R. (1940) Über die Wirkung von Darmbakterien auf Trimethylammoniumbasen. *Ber Ges*  
658 *Physiol Exp Pharm* 118, 303.

659 Yonejima, Y., Ushida, K. and Mori, Y. (2013) Effect of lactic acid bacteria on lipid metabolism and  
660 fat synthesis in mice fed a high-fat diet. *Biosci Microbiota Food Health* 32, 51–58.

661 Zeisel, S.H. and Da Costa, K.A. (1986) Increase in human exposure to methylamine precursors of *N*-  
662 nitrosamine after eating fish. *Cancer Res* 46, 6136–6138.

663 Zeisel, S.H., Wishnok, J.S. and Blusztajn, J.K. (1983) Formation of methylamines from ingested  
664 choline and lecithin. *J Pharmacol Exp Ther* 225, 320–324.

665 Zhang, J., Cerny, M.A., Lawson, M., Mosadeghi, R. and Cashman, J.R. (2007) Functional activity of  
666 the mouse flavin-containing monooxygenase forms 1, 3, and 5. *J Biochem Mol Toxicol* 21, 206–  
667 215.

668 Zoetendal, E.G., Raes, J., van den Bogert, B., Arumugam, M., Booiijink, C.C., Troost, F.J., Bork, P.,  
669 Wels, M., de Vos, W.M. and Kleerebezem, M. (2012) The human small intestinal microbiota is  
670 driven by rapid uptake and conversion of simple carbohydrates. *ISME J* 6, 1415–1426.

## FIGURE LEGENDS

**Fig. 1.** *In vivo* confirmation of metabolic retroconversion of TMAO. Reduction of d<sub>9</sub>-TMAO to d<sub>9</sub>-TMA was quantified by UPLC–MS/MS up to 6 h after d<sub>9</sub>-TMAO gavage and antibiotic treatment, together with unlabelled TMA and TMAO levels. Plasma quantification of post-gavage (A) d<sub>9</sub>-TMA and (B) d<sub>9</sub>-TMAO. \*, Significantly ( $P < 0.05$ ;  $t$  test and corrected for multiple comparison using the Holm–Sidak method) different from the respective groups not treated with antibiotics. (C) d<sub>9</sub>-TMA bioavailability (AUC). (D) d<sub>9</sub>-TMAO bioavailability (AUC). Plasma quantification of post-gavage unlabelled/endogenous (E) TMA and (F) TMAO. \*, Significant between d<sub>9</sub> and d<sub>9</sub> antibiotic treatment; \$, significant between TMAO and TMAO antibiotic treatment. (G) Unlabelled/endogenous TMA bioavailability (AUC). (H) Unlabelled/endogenous TMAO bioavailability (AUC). Data ( $n = 6$  per group) are shown as mean  $\pm$  SEM. (A, B, E and F). Differences between the bioavailabilities (C, D, G and H) were assessed using one-way analysis of variance (ANOVA), followed by Holm–Sidak post hoc tests. Data with different superscript letters are significantly different ( $P < 0.05$ ).

**Fig. 2.** Effect of TMAO on mixed faecal microbial population *in vitro*. (A) Enumeration of selected bacteria in fermentation vessels by FISH analysis. Red lines, TMAO-containing systems; blue lines, negative controls. Data are shown as mean  $\pm$  SD ( $n = 3$ ). Eub338, total bacteria; Ent, *Enterobacteriaceae*; Bif164, *Bifidobacterium* spp.; Lab158, lactic acid bacteria. \*, Statistically significantly different (adjusted  $P < 0.05$ ) from the control at the same time point. Full data are shown in **Supplementary Figure 1**. (B) <sup>1</sup>H-NMR data for batch culture samples. Data are shown mean  $\pm$  SD ( $n = 3$ ). Red lines, TMAO-containing systems; blue lines, negative controls. \*, Statistically significantly different ( $P < 0.05$ ) from the negative control at the same time point. (C) Bidirectional clustering of correlation matrix of FISH data and data for the six metabolites found in highest amounts in the NMR spectra from the batch-culture samples. +, Adjusted  $P$  value (Benjamini–Hochberg) statistically significant ( $P < 0.05$ ). FISH and metabolite data and a table of correlations and adjusted  $P$  values (Benjamini–Hochberg) for the batch-culture samples are available in **Supplementary Tables 3–5**.

**Fig. 3.** Influence of TMAO on growth and metabolism of pure cultures of gut bacteria. (A) Representative growth curves for isolates grown in the presence and absence of TMAO. Red lines, TMAO-supplemented cultures; blue lines, negative controls. Data are shown as mean  $\pm$  SD ( $n = 3$ ). (B) Biplot showing production of various metabolites when isolates were grown in the presence of TMAO. Summary of data from **Supplementary Table 2**. The larger a circle, the more of the metabolite produced by an isolate. (C) Differences in metabolites produced when caecal and faecal isolates of *Escherichia coli* were grown in the presence (+) and absence (–) of 1 % TMAO. Adjusted (Benjamini–Hochberg)  $P$  values indicate the caecal isolates were significantly different from the faecal isolates for a particular metabolite. (D) Lactate production by lactic acid bacteria was increased in the presence of TMAO. *Enterobacteriaceae*,  $n = 20$ ; *Bifidobacteriaceae*,  $n = 17$ ; *Streptococcaceae*,  $n = 7$ ; *Enterococcaceae*,  $n = 5$ . Members of the *Enterococcaceae* and *Streptococcaceae* are homofermenters (produce only lactic acid from glucose fermentation), whereas the *Bifidobacteriaceae* are heterofermenters (produce ethanol, CO<sub>2</sub> and lactic acid from glucose fermentation), though it should be noted the bifidobacteria included in this study were grown on raffinose-containing media. Red, TMAO-containing medium; blue, negative control. \*, Statistically significantly different from its negative control (adjusted  $P$  value  $< 0.05$ ).

715 **Fig. 1**

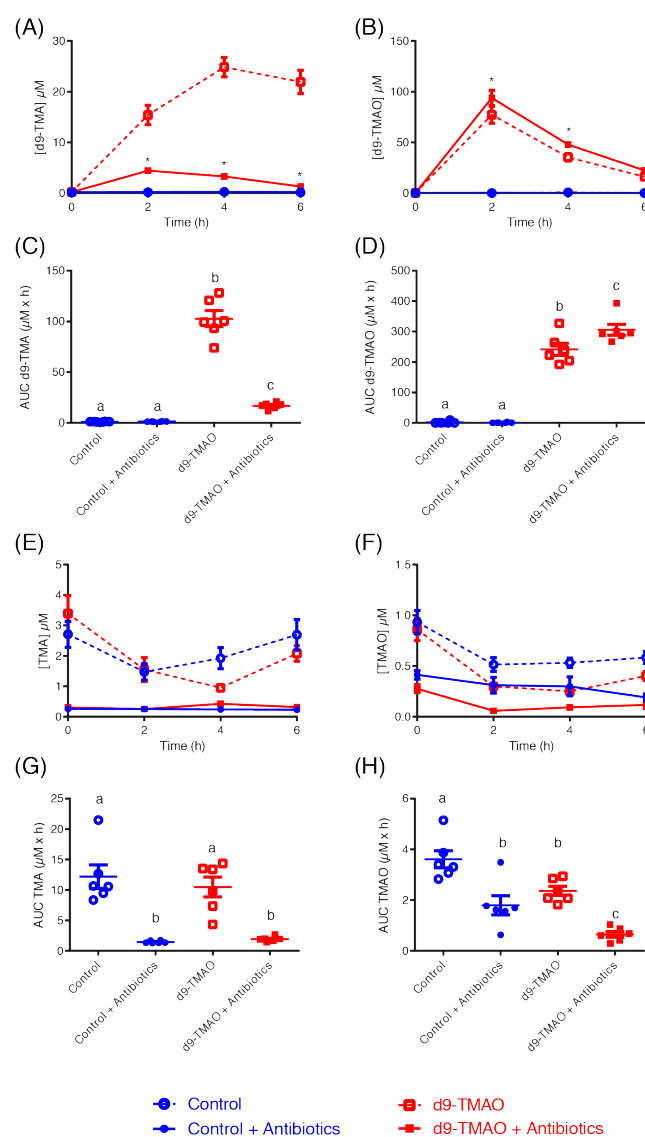

716

717

**Fig. 2**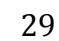

720 **Fig. 3**

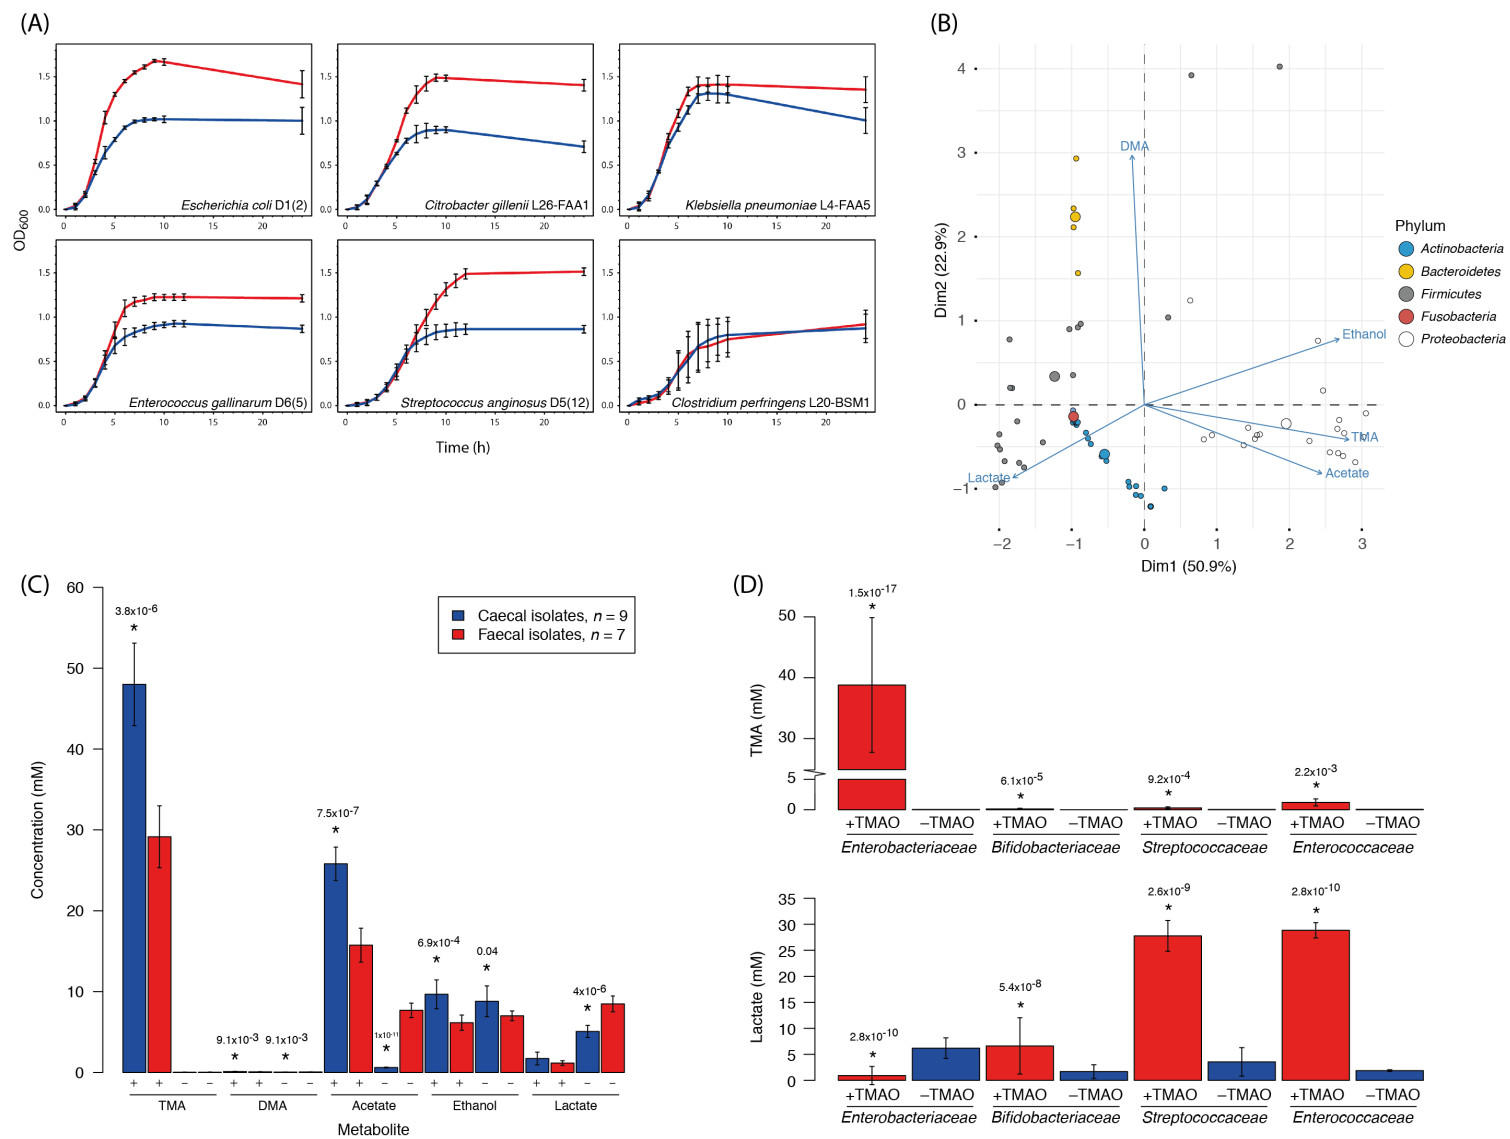

722 **Table 1.** Details for human-derived gut bacteria screened for their ability to reduce or utilize TMAO

| Isolate*               | Identified as                                         | Source           | Reference                          | Facultative anaerobe? |
|------------------------|-------------------------------------------------------|------------------|------------------------------------|-----------------------|
| D2(9)                  | <i>[Clostridium] innocuum</i>                         | Human faeces     | M.L. Jiménez-Pranteda, unpublished | No                    |
| L16-FAA1               | <i>[Clostridium] ramosum</i>                          | Human caecum     | L. Hoyles, unpublished             | No                    |
| L12-BSM1               | <i>Actinomyces odontolyticus</i>                      | Human caecum     | L. Hoyles, unpublished             | No                    |
| L6-BSM10               | <i>Actinomyces viscosus</i>                           | Human caecum     | L. Hoyles, unpublished             | No                    |
| L6-FAA7                | <i>Bacteroides fragilis</i>                           | Human caecum     | L. Hoyles, unpublished             | No                    |
| D1(4)                  | <i>Bacteroides vulgatus</i>                           | Human faeces     | M.L. Jiménez-Pranteda, unpublished | No                    |
| L9-FAA7                | <i>Bacteroides vulgatus</i>                           | Human caecum     | L. Hoyles, unpublished             | No                    |
| DSM 20083 <sup>T</sup> | <i>Bifidobacterium adolescentis</i>                   | Human intestine  | DSMZ <sup>†</sup>                  | No                    |
| LCR26                  | <i>Bifidobacterium animalis</i> subsp. <i>lactis</i>  | Infant faeces    | Roger <i>et al.</i> (2010)         | No                    |
| LCR11                  | <i>Bifidobacterium bifidum</i>                        | Infant faeces    | Roger <i>et al.</i> (2010)         | No                    |
| L25-MRS2               | <i>Bifidobacterium bifidum</i>                        | Human caecum     | L. Hoyles, unpublished             | No                    |
| LCR5                   | <i>Bifidobacterium breve</i>                          | Infant faeces    | Roger <i>et al.</i> (2010)         | No                    |
| LCR8                   | <i>Bifidobacterium breve</i>                          | Infant faeces    | Roger <i>et al.</i> (2010)         | No                    |
| LCR1                   | <i>Bifidobacterium dentium</i>                        | Infant faeces    | Roger <i>et al.</i> (2010)         | No                    |
| DSM 20093 <sup>T</sup> | <i>Bifidobacterium gallicum</i>                       | Human intestine  | DSMZ                               | No                    |
| LCR6                   | <i>Bifidobacterium longum</i>                         | Infant faeces    | Roger <i>et al.</i> (2010)         | No                    |
| DSM 20088 <sup>T</sup> | <i>Bifidobacterium longum</i> subsp. <i>infantis</i>  | Infant intestine | DSMZ                               | No                    |
| LCR2                   | <i>Bifidobacterium longum</i> subsp. <i>infantis</i>  | Infant faeces    | Roger <i>et al.</i> (2010)         | No                    |
| DSM 20219 <sup>T</sup> | <i>Bifidobacterium longum</i> subsp. <i>longum</i>    | Human intestine  | DSMZ                               | No                    |
| LCR3                   | <i>Bifidobacterium pseudocatenulatum</i>              | Infant faeces    | Roger <i>et al.</i> (2010)         | No                    |
| L19-MRS1               | <i>Bifidobacterium longum</i> subsp. <i>longum</i>    | Human caecum     | L. Hoyles, unpublished             | No                    |
| L25-MRS8               | <i>Bifidobacterium longum</i> subsp. <i>longum</i>    | Human caecum     | L. Hoyles, unpublished             | No                    |
| L26-MRS4               | <i>Bifidobacterium animalis</i> subsp. <i>lactis</i>  | Human caecum     | L. Hoyles, unpublished             | No                    |
| L26-FAA1               | <i>Citrobacter gillenii</i>                           | Human caecum     | L. Hoyles, unpublished             | Yes                   |
| L8-FAA3                | <i>Citrobacter koseri</i>                             | Human caecum     | L. Hoyles, unpublished             | Yes                   |
| L16-FAA6               | <i>Clostridium paraputrificum</i>                     | Human caecum     | L. Hoyles, unpublished             | No                    |
| L20-BSM1               | <i>Clostridium perfringens</i>                        | Human caecum     | L. Hoyles, unpublished             | No                    |
| D1(9)                  | <i>Clostridium sporogenes</i>                         | Human faeces     | M.L. Jiménez-Pranteda, unpublished | No                    |
| D2(14)                 | <i>Enterococcus faecalis</i>                          | Human faeces     | M.L. Jiménez-Pranteda, unpublished | Yes                   |
| D3(1)                  | <i>Enterococcus faecalis</i>                          | Human faeces     | M.L. Jiménez-Pranteda, unpublished | Yes                   |
| D5(2)                  | <i>Enterococcus faecalis</i>                          | Human faeces     | M.L. Jiménez-Pranteda, unpublished | Yes                   |
| D6(1)                  | <i>Enterococcus faecium</i>                           | Human faeces     | M.L. Jiménez-Pranteda, unpublished | Yes                   |
| D6(5)                  | <i>Enterococcus gallinarum</i>                        | Human faeces     | M.L. Jiménez-Pranteda, unpublished | Yes                   |
| D1(2)                  | <i>Escherichia coli</i>                               | Human faeces     | M.L. Jiménez-Pranteda, unpublished | Yes                   |
| D2(1)                  | <i>Escherichia coli</i>                               | Human faeces     | M.L. Jiménez-Pranteda, unpublished | Yes                   |
| D2(2)                  | <i>Escherichia coli</i>                               | Human faeces     | M.L. Jiménez-Pranteda, unpublished | Yes                   |
| D2(8)                  | <i>Escherichia coli</i>                               | Human faeces     | M.L. Jiménez-Pranteda, unpublished | Yes                   |
| D3(8)                  | <i>Escherichia coli</i>                               | Human faeces     | M.L. Jiménez-Pranteda, unpublished | Yes                   |
| D4(15)                 | <i>Escherichia coli</i>                               | Human faeces     | M.L. Jiménez-Pranteda, unpublished | Yes                   |
| D5(1)                  | <i>Escherichia coli</i>                               | Human faeces     | M.L. Jiménez-Pranteda, unpublished | Yes                   |
| L1-FAA5                | <i>Escherichia coli</i>                               | Human caecum     | L. Hoyles, unpublished             | Yes                   |
| L13-FAA2               | <i>Escherichia coli</i>                               | Human caecum     | L. Hoyles, unpublished             | Yes                   |
| L16-FAA5               | <i>Escherichia coli</i>                               | Human caecum     | L. Hoyles, unpublished             | Yes                   |
| L19-FAA2               | <i>Escherichia coli</i>                               | Human caecum     | L. Hoyles, unpublished             | Yes                   |
| L20-FAA3               | <i>Escherichia coli</i>                               | Human caecum     | L. Hoyles, unpublished             | Yes                   |
| L24-FAA5               | <i>Escherichia coli</i>                               | Human caecum     | L. Hoyles, unpublished             | Yes                   |
| L5-FAA2                | <i>Escherichia coli</i>                               | Human caecum     | L. Hoyles, unpublished             | Yes                   |
| L6-FAA1                | <i>Escherichia coli</i>                               | Human caecum     | L. Hoyles, unpublished             | Yes                   |
| L9-MRS1                | <i>Escherichia coli</i>                               | Human caecum     | L. Hoyles, unpublished             | Yes                   |
| L9-FAA5                | <i>Fusobacterium ulcerans</i>                         | Human caecum     | L. Hoyles, unpublished             | Yes                   |
| L15-FAA9               | <i>Hafnia paralvei</i>                                | Human caecum     | L. Hoyles, unpublished             | No                    |
| L4-FAA5                | <i>Klebsiella pneumoniae</i> subsp. <i>pneumoniae</i> | Human caecum     | Hoyles <i>et al.</i> (2015)        | Yes                   |
| L26-MRS5               | <i>Lactobacillus fermentum</i>                        | Human caecum     | L. Hoyles, unpublished             | No                    |

|           |                                     |               |                                    |     |
|-----------|-------------------------------------|---------------|------------------------------------|-----|
| L26-FAA6  | <i>Lactobacillus rhamnosus</i>      | Human caecum  | L. Hoyles, unpublished             | No  |
| L13-FAA10 | <i>Parabacteroides johnsonii</i>    | Human caecum  | L. Hoyles, unpublished             | No  |
| D4(1)     | <i>Paraclostridium bifermentans</i> | Human faeces  | M.L. Jiménez-Pranteda, unpublished | No  |
| L1-FAA6   | <i>Pseudomonas aeruginosa</i>       | Human caecum  | L. Hoyles, unpublished             | Yes |
| D2(4)     | <i>Staphylococcus hominis</i>       | Human faeces  | M.L. Jiménez-Pranteda, unpublished | Yes |
| D1(5)     | <i>Streptococcus anginosus</i>      | Human faeces  | M.L. Jiménez-Pranteda, unpublished | Yes |
| D5(12)    | <i>Streptococcus anginosus</i>      | Human faeces  | M.L. Jiménez-Pranteda, unpublished | Yes |
| L25-MRS1  | <i>Streptococcus gallolyticus</i>   | Human caecum  | L. Hoyles, unpublished             | Yes |
| L4-MRS5   | <i>Streptococcus oralis</i>         | Human caecum  | L. Hoyles, unpublished             | Yes |
| L4-MRS1   | <i>Streptococcus sanguinis</i>      | Human caecum  | L. Hoyles, unpublished             | Yes |
| D4(3)     | <i>Streptococcus</i> sp.            | Human faeces  | M.L. Jiménez-Pranteda, unpublished | Yes |
| L26-MRS7  | <i>Streptococcus vestibularis</i>   | Human caecum  | L. Hoyles, unpublished             | Yes |
| LCR4      | Unknown <i>Bifidobacterium</i>      | Infant faeces | Roger <i>et al.</i> (2010)         | No  |

723

724 \*Ln- prefix, different numbers indicate isolates recovered from different individuals.

725 †DSMZ, Leibniz Institute DSMZ – German Collection of Microorganisms and Cell Cultures.

726

## 727 SUPPLEMENTARY MATERIAL

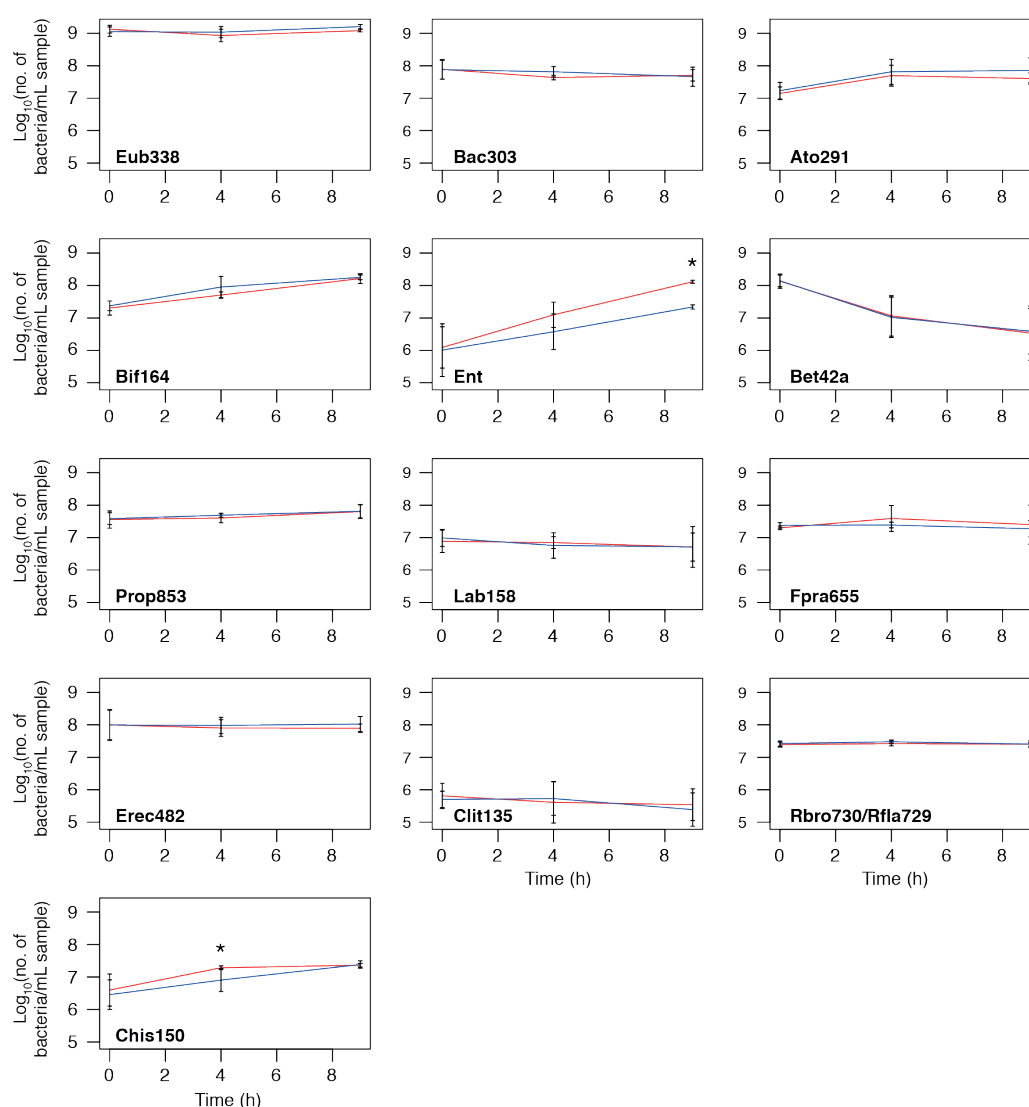

728

729 **Supplementary Figure 1.** Effect of TMAO on mixed faecal microbial population *in vitro*.

730 Enumeration of bacteria in fermentation vessels by FISH analysis. Red lines, TMAO-containing

731 systems; blue lines, negative controls. Data are shown as mean + SD ( $n = 3$ ). Eub338, total bacteria;

732 Bac303, *Bacteroidales*; Ato291, '*Atopobium* cluster'; Bif164, *Bifidobacterium* spp.; Ent,

733 *Enterobacteriaceae*; Bet42a, *Betaproteobacteria*; Prop853, *Veillonellaceae*; Lab158, lactic acid

734 bacteria (*Lactobacillales*); Fpra655, *Faecalibacterium prausnitzii* and *Subdoligranulum* spp.;

735 Erec482, *Lachnospiraceae*; Clit135, *Clostridium* cluster XI; Rbro730/Rfla729, *Ruminococcaceae*;

736 Chis150, *Clostridium* clusters I and II. Detection limit of the method was 4.95  $\log_{10}$ (number of

737 bacteria/mL sample). \*, Statistically significantly different (adjusted  $P < 0.05$ ) from the control at the

738 same time point.

739 **Supplementary Table 1.** Oligonucleotide probes used in this study

| Probe name                         | Detects                                                                                                                                                                                                                                                                                                                                                      | Probe accession no.*               | Hybridization pre-treatment† | Formamide (%) in hybridization buffer | Temperature (°C) |         | Reference(s)                                                |
|------------------------------------|--------------------------------------------------------------------------------------------------------------------------------------------------------------------------------------------------------------------------------------------------------------------------------------------------------------------------------------------------------------|------------------------------------|------------------------------|---------------------------------------|------------------|---------|-------------------------------------------------------------|
|                                    |                                                                                                                                                                                                                                                                                                                                                              |                                    |                              |                                       | Hybridization    | Washing |                                                             |
| Ato291                             | <i>Cryptobacterium curtum</i> , <i>Gordonibacter pamelaee</i> , <i>Paraeggerthella hongkongensis</i> , all <i>Eggerthella</i> , <i>Collinsella</i> , <i>Olsenella</i> and <i>Atopobium</i> species; ‘ <i>Enorma</i> ’ and <i>Senegalemassilia</i> spp. (most members of the class <i>Coriobacteriia</i> ; phylum <i>Actinobacteria</i> )                     | pB-00943                           | Lysozyme                     | 0                                     | 50               | 50      | Harmsen <i>et al.</i> (2000); Thorasin <i>et al.</i> (2015) |
| Bac303                             | Most members of the genus <i>Bacteroides</i> , some <i>Parabacteroides</i> and <i>Prevotella</i> species, <i>Paraprevotella</i> , <i>Xylanibacter</i> , <i>Barnesiella</i> species and <i>Odoribacter splanchnicus</i> (order <i>Bacteroidales</i> ; phylum <i>Bacteroidetes</i> )                                                                           | pB-00031                           | None                         | 0                                     | 46               | 48      | Manz <i>et al.</i> (1996); Hoyles and McCartney (2009)      |
| Bet42a                             | <i>Betaproteobacteria</i> (class <i>Betaproteobacteria</i> ; phylum <i>Proteobacteria</i> )                                                                                                                                                                                                                                                                  | pB-00034                           | None                         | 35                                    | 46               | 48      | Manz <i>et al.</i> (1992)                                   |
| Bifl164                            | Most <i>Bifidobacterium</i> species and <i>Parascardovia denticolens</i> (family <i>Bifidobacteriaceae</i> ; phylum <i>Actinobacteria</i> )                                                                                                                                                                                                                  | pB-00037                           | Lysozyme                     | 0                                     | 50               | 50      | Langendijk <i>et al.</i> (1995)                             |
| Chis150                            | Most members of <i>Clostridium</i> cluster I, all members of <i>Clostridium</i> cluster II (family <i>Clostridiaceae</i> ; phylum <i>Firmicutes</i> )                                                                                                                                                                                                        | pB-00962                           | None                         | 0                                     | 50               | 50      | Franks <i>et al.</i> (1998)                                 |
| Clit135                            | Nine members of [ <i>Clostridium</i> ] cluster XI, including [ <i>Clostridium</i> ] <i>difficile</i> (family <i>Peptostreptococcaceae</i> ; phylum <i>Firmicutes</i> )                                                                                                                                                                                       | pB-00961                           | None                         | 0                                     | 50               | 50      | Franks <i>et al.</i> (1998)                                 |
| Ent                                | <i>Enterobacteriaceae</i> except <i>Proteus</i> spp. (order <i>Gammaproteobacteria</i> ; phylum <i>Proteobacteria</i> )                                                                                                                                                                                                                                      | pB-00351                           | None                         | 30                                    | 46               | 48      | Kempf <i>et al.</i> (2000)                                  |
| Erec482                            | Most members of <i>Clostridium</i> cluster XIVa (family <i>Lachnospiraceae</i> ; phylum <i>Firmicutes</i> )                                                                                                                                                                                                                                                  | pB-00963                           | None                         | 0                                     | 50               | 50      | Franks <i>et al.</i> (1998)                                 |
| Eub338/<br>Eub338II/<br>Eub338III‡ | <i>Bacteria</i>                                                                                                                                                                                                                                                                                                                                              | pB-00159/<br>pB-00160/<br>pB-00161 | None                         | 35                                    | 46               | 48      | Daims <i>et al.</i> (1999)                                  |
| Fpra655                            | <i>Faecalibacterium prausnitzii</i> and <i>Subdoligranulum</i> spp. ( <i>Clostridium</i> cluster IV; family <i>Ruminococcaceae</i> ; phylum <i>Firmicutes</i> )                                                                                                                                                                                              | pB-00734                           | None                         | 0                                     | 58               | 58      | Hold <i>et al.</i> (2003)                                   |
| Lab158                             | All <i>Oenococcus</i> , <i>Vagococcus</i> , <i>Melissococcus</i> , <i>Tetragenococcus</i> , <i>Enterococcus</i> , <i>Catelicoccus</i> , <i>Paralactobacillus</i> , <i>Pediococcus</i> and <i>Lactococcus</i> species, most <i>Lactobacillus</i> , <i>Weissella</i> and <i>Leuconostoc</i> species (order <i>Lactobacillales</i> ; phylum <i>Firmicutes</i> ) | pB-03928                           | Lysozyme                     | 0                                     | 50               | 50      | Harmsen <i>et al.</i> (1999)                                |
| Prop853                            | Most members of <i>Clostridium</i> cluster IX (family <i>Veillonellaceae</i> ; phylum <i>Firmicutes</i> )                                                                                                                                                                                                                                                    | pB-03930                           | None                         | 0                                     | 50               | 50      | Walker <i>et al.</i> (2005)                                 |
| Rbro730/<br>Rfla729‡               | <i>Anaerotruncus colihominis</i> , <i>Ruminococcus bromii</i> , <i>Ruminococcus flavefaciens</i> , <i>Ruminococcus albus</i> , <i>Desulfotomaculum alcoholivorax</i> ( <i>Clostridium</i> cluster IV; family <i>Ruminococcaceae</i> ; phylum <i>Firmicutes</i> )                                                                                             | pB-00558/<br>pB-00557              | Lysozyme                     | 20                                    | 50               | 50      | Harmsen <i>et al.</i> (2002)                                |

740 \*According to probeBase (Loy *et al.*, 2007).

741 †As described by Martín-Peláez *et al.* (2008).

742 ‡These probes were used together in equimolar concentrations (each at 50 ng/μL).

743

744 **Supplementary Table 2.** NMR-based analysis of metabolites in growth medium of pure cultures after 24-h incubation (anaerobic) in the presence and absence of  
745 TMAO  
746

| Species and isolate*                                          | Family, phylum                         | TMA (mM) |       | DMA (mM) |       | Acetate (mM) |       | Ethanol |       | Lactate |       |
|---------------------------------------------------------------|----------------------------------------|----------|-------|----------|-------|--------------|-------|---------|-------|---------|-------|
|                                                               |                                        | +TMAO    | -TMAO | +TMAO    | -TMAO | +TMAO        | -TMAO | +TMAO   | -TMAO | +TMAO   | -TMAO |
| <i>Escherichia coli</i> L6-FAA1                               | Enterobacteriaceae, Proteobacteria     | 53.94    | 0.03  | 0.03     | 0.05  | 28.17        | 0.70  | 7.64    | 8.20  | 0.19    | 5.10  |
| <i>Escherichia coli</i> L24-FAA5                              | Enterobacteriaceae, Proteobacteria     | 53.94    | 0.04  | 0.07     | 0.05  | 27.67        | 0.56  | 7.14    | 4.00  | 2.40    | 6.00  |
| <i>Escherichia coli</i> L9-MRS1                               | Enterobacteriaceae, Proteobacteria     | 52.94    | 0.02  | 0.08     | 0.04  | 27.17        | 0.60  | 9.14    | 10.20 | 0.00    | 4.70  |
| <i>Escherichia coli</i> L19-FAA2                              | Enterobacteriaceae, Proteobacteria     | 51.94    | 0.03  | 0.03     | 0.05  | 24.17        | 0.60  | 7.64    | 9.80  | 0.02    | 4.80  |
| <i>Hafnia paralvei</i> L15-FAA9                               | Enterobacteriaceae, Proteobacteria     | 45.44    | 0.03  | 0.08     | 0.07  | 23.97        | 5.20  | 6.44    | 14.60 | 0.80    | 2.50  |
| <i>Escherichia coli</i> L13-FAA2                              | Enterobacteriaceae, Proteobacteria     | 44.94    | 0.03  | 0.00     | 0.04  | 23.47        | 0.60  | 8.64    | 10.00 | 0.00    | 4.50  |
| <i>Escherichia coli</i> L16-FAA5                              | Enterobacteriaceae, Proteobacteria     | 44.94    | 0.03  | 0.06     | 0.05  | 23.17        | 0.60  | 9.64    | 9.30  | 0.06    | 4.80  |
| <i>Escherichia coli</i> L20-FAA3                              | Enterobacteriaceae, Proteobacteria     | 43.94    | 0.04  | 0.07     | 0.07  | 24.17        | 0.70  | 12.64   | 9.00  | 0.15    | 6.50  |
| <i>Escherichia coli</i> L1-FAA5                               | Enterobacteriaceae, Proteobacteria     | 42.94    | 0.03  | 0.03     | 0.05  | 23.67        | 0.60  | 10.64   | 9.00  | 0.03    | 5.20  |
| <i>Citrobacter koseri</i> L8-FAA3                             | Enterobacteriaceae, Proteobacteria     | 42.24    | 0.02  | 0.35     | 0.04  | 21.17        | 0.74  | 10.64   | 11.00 | 5.30    | 5.00  |
| <i>Escherichia coli</i> L5-FAA2                               | Enterobacteriaceae, Proteobacteria     | 41.94    | 0.02  | 0.07     | 0.03  | 23.17        | 0.60  | 10.64   | 9.70  | 0.32    | 4.10  |
| <i>Citrobacter gillenii</i> L26-FAA1                          | Enterobacteriaceae, Proteobacteria     | 37.94    | 0.03  | 0.13     | 0.06  | 18.77        | 0.60  | 12.64   | 11.00 | 4.60    | 5.40  |
| <i>Escherichia coli</i> D3(8)                                 | Enterobacteriaceae, Proteobacteria     | 32.64    | 0.04  | 0.03     | 0.08  | 16.77        | 6.80  | 6.14    | 6.90  | 0.00    | 8.70  |
| <i>Escherichia coli</i> D2(8)                                 | Enterobacteriaceae, Proteobacteria     | 31.84    | 0.03  | 0.02     | 0.06  | 16.47        | 8.20  | 6.74    | 7.00  | 0.00    | 8.50  |
| <i>Escherichia coli</i> D2(2)                                 | Enterobacteriaceae, Proteobacteria     | 31.54    | 0.03  | 0.01     | 0.06  | 16.27        | 8.00  | 6.34    | 6.80  | 0.00    | 9.50  |
| <i>Escherichia coli</i> D1(2)                                 | Enterobacteriaceae, Proteobacteria     | 30.34    | 0.03  | 0.00     | 0.07  | 16.17        | 8.60  | 5.44    | 8.00  | 0.00    | 9.40  |
| <i>Escherichia coli</i> D4(15)                                | Enterobacteriaceae, Proteobacteria     | 29.94    | 0.03  | 0.03     | 0.06  | 14.67        | 6.75  | 6.64    | 6.40  | 0.20    | 7.30  |
| <i>Escherichia coli</i> D2(1)                                 | Enterobacteriaceae, Proteobacteria     | 24.44    | 0.05  | 0.00     | 0.08  | 11.67        | 8.70  | 4.14    | 7.60  | 0.00    | 9.00  |
| <i>Escherichia coli</i> D5(1)                                 | Enterobacteriaceae, Proteobacteria     | 22.94    | 0.04  | 0.00     | 0.05  | 12.37        | 6.70  | 5.14    | 6.40  | 0.00    | 7.00  |
| <i>Klebsiella pneumoniae</i> subsp. <i>pneumoniae</i> L4-FAA5 | Enterobacteriaceae, Proteobacteria     | 14.94    | 0.02  | 0.41     | 0.05  | 10.17        | 0.52  | 7.14    | 12.00 | 4.40    | 5.90  |
| <i>Clostridium sporogenes</i> D1(9)                           | Clostridiaceae (Cluster I), Firmicutes | 4.64     | 0.12  | 1.03     | 0.07  | 17.37        | 16.90 | 16.24   | 13.50 | 0.10    | 0.90  |
| [ <i>Clostridium</i> ] <i>bifermantans</i> D4(1)              | Peptostreptococcaceae, Firmicutes      | 3.72     | 0.00  | 1.08     | 0.00  | 12.15        | 0.00  | 8.81    | 0.00  | 0.03    | 0.00  |
| <i>Clostridium perfringens</i> L20-BSM1                       | Clostridiaceae (Cluster I), Firmicutes | 2.19     | 0.03  | 0.23     | 0.06  | 1.97         | 0.81  | 10.64   | 5.30  | 4.80    | 5.90  |
| <i>Enterococcus gallinarum</i> D6(5)                          | Enterococcaceae, Firmicutes            | 1.74     | 0.04  | 0.30     | 0.15  | 0.00         | 0.77  | 1.24    | 0.83  | 29.80   | 2.00  |
| <i>Bacteroides vulgatus</i> L9-FAA7                           | Bacteroidaceae, Bacteroidetes          | 1.70     | 0.00  | 0.88     | 0.00  | 2.65         | 0.00  | 0.00    | 0.00  | 0.00    | 0.00  |
| <i>Enterococcus faecalis</i> D5(2)                            | Enterococcaceae, Firmicutes            | 1.64     | 0.05  | 0.45     | 0.13  | 0.00         | 0.67  | 0.82    | 1.04  | 27.80   | 1.60  |
| <i>Parabacteroides johnsonii</i> L13-FAA10                    | Porphyromonadaceae, Bacteroidetes      | 1.42     | 0.00  | 0.65     | 0.00  | 1.51         | 0.00  | 0.00    | 0.00  | 0.24    | 0.00  |
| <i>Bacteroides fragilis</i> L6-FAA7                           | Bacteroidaceae, Bacteroidetes          | 1.42     | 0.00  | 0.51     | 0.00  | 2.67         | 0.00  | 0.00    | 0.00  | 0.56    | 0.00  |
| <i>Enterococcus faecalis</i> D3(1)                            | Enterococcaceae, Firmicutes            | 1.24     | 0.06  | 0.29     | 0.16  | 0.00         | 0.74  | 1.24    | 1.02  | 28.60   | 2.00  |

|                                                               |                                               |      |      |      |      |       |       |      |      |       |      |
|---------------------------------------------------------------|-----------------------------------------------|------|------|------|------|-------|-------|------|------|-------|------|
| <i>Bacteroides vulgatus</i> D1(4)                             | <i>Bacteroidaceae, Bacteroidetes</i>          | 1.08 | 0.02 | 0.71 | 0.01 | 1.66  | 2.82  | 0.06 | 0.00 | 0.12  | 0.33 |
| <i>Clostridium paraputrificum</i> L16-FAA6                    | <i>Clostridiaceae (Cluster I), Firmicutes</i> | 1.04 | 0.03 | 0.33 | 0.07 | 1.37  | 0.63  | 1.04 | 2.50 | 2.00  | 3.60 |
| <i>Enterococcus faecalis</i> D2(14)                           | <i>Enterococcaceae, Firmicutes</i>            | 1.00 | 0.05 | 0.17 | 0.14 | 0.00  | 0.69  | 1.34 | 1.40 | 27.20 | 1.80 |
| [ <i>Clostridium</i> ] <i>ramosum</i> L16-FAA1                | <i>Erysipelotrichaceae, Firmicutes</i>        | 0.94 | 0.07 | 0.33 | 0.09 | 1.47  | 0.60  | 1.34 | 1.80 | 4.30  | 5.20 |
| <i>Streptococcus sanguinis</i> L4-MRS1                        | <i>Streptococcaceae, Firmicutes</i>           | 0.49 | 0.03 | 0.02 | 0.06 | 0.00  | 0.60  | 0.34 | 0.33 | 22.90 | 9.20 |
| <i>Streptococcus anginosus</i> D5(12)                         | <i>Streptococcaceae, Firmicutes</i>           | 0.48 | 0.02 | 0.16 | 0.12 | 0.00  | 0.60  | 0.09 | 0.46 | 29.30 | 2.00 |
| <i>Streptococcus anginosus</i> D1(5)                          | <i>Streptococcaceae, Firmicutes</i>           | 0.44 | 0.03 | 0.11 | 0.14 | 0.00  | 0.64  | 0.06 | 0.38 | 29.10 | 2.20 |
| <i>Bifidobacterium breve</i> LCR5                             | <i>Bifidobacteriaceae, Actinobacteria</i>     | 0.38 | 0.03 | 0.04 | 0.00 | 32.04 | 26.51 | 2.00 | 0.89 | 12.77 | 0.68 |
| <i>Staphylococcus hominis</i> D2(4)                           | <i>Staphylococcaceae, Firmicutes</i>          | 0.34 | 0.03 | 0.33 | 0.08 | 1.47  | 2.30  | 0.08 | 0.32 | 2.50  | 4.00 |
| <i>Enterococcus faecium</i> D6(1)                             | <i>Enterococcaceae, Firmicutes</i>            | 0.31 | 0.06 | 0.13 | 0.14 | 0.00  | 0.70  | 0.30 | 0.37 | 30.80 | 1.95 |
| <i>Bifidobacterium infantis</i> DSM 20088T                    | <i>Bifidobacteriaceae, Actinobacteria</i>     | 0.27 | 0.02 | 0.04 | 0.00 | 27.56 | 29.81 | 0.34 | 0.21 | 12.01 | 0.94 |
| <i>Streptococcus vestibularis</i> L26-MRS7                    | <i>Streptococcaceae, Firmicutes</i>           | 0.25 | 0.02 | 0.00 | 0.05 | 0.00  | 0.40  | 0.28 | 0.65 | 29.40 | 2.20 |
| <i>Bifidobacterium bifidum</i> LCR11                          | <i>Bifidobacteriaceae, Actinobacteria</i>     | 0.24 | 0.02 | 0.02 | 0.01 | 33.14 | 33.91 | 0.50 | 0.49 | 14.13 | 0.91 |
| <i>Lactobacillus fermentum</i> L26-MRS5                       | <i>Lactobacillaceae, Firmicutes</i>           | 0.22 | 0.02 | 0.16 | 0.03 | 0.47  | 1.50  | 0.19 | 0.80 | 0.70  | 2.70 |
| <i>Bifidobacterium longum</i> LCR6                            | <i>Bifidobacteriaceae, Actinobacteria</i>     | 0.22 | 0.02 | 0.02 | 0.01 | 23.86 | 23.77 | 0.39 | 0.06 | 10.47 | 0.77 |
| <i>Bifidobacterium longum</i> DSM 20219 <sup>T</sup>          | <i>Bifidobacteriaceae, Actinobacteria</i>     | 0.20 | 0.02 | 0.02 | 0.00 | 27.92 | 23.19 | 0.58 | 0.28 | 13.51 | 0.83 |
| <i>Bifidobacterium longum</i> subsp. <i>infantis</i> LCR2     | <i>Bifidobacteriaceae, Actinobacteria</i>     | 0.18 | 0.03 | 0.02 | 0.01 | 25.11 | 0.00  | 0.38 | 0.02 | 11.65 | 0.74 |
| <i>Streptococcus oralis</i> L4-MRS5                           | <i>Streptococcaceae, Firmicutes</i>           | 0.16 | 0.02 | 0.00 | 0.05 | 0.00  | 0.60  | 1.39 | 0.80 | 24.60 | 5.10 |
| <i>Streptococcus</i> sp. D4(3)                                | <i>Streptococcaceae, Firmicutes</i>           | 0.16 | 0.03 | 0.06 | 0.13 | 0.00  | 0.56  | 0.25 | 0.40 | 27.90 | 1.90 |
| <i>Streptococcus galloyticus</i> L25-MRS1                     | <i>Streptococcaceae, Firmicutes</i>           | 0.14 | 0.04 | 0.00 | 0.06 | 0.00  | 0.60  | 0.09 | 0.35 | 31.20 | 2.20 |
| <i>Bifidobacterium pseudocatenulatum</i> LCR3                 | <i>Bifidobacteriaceae, Actinobacteria</i>     | 0.14 | 0.03 | 0.01 | 0.02 | 28.26 | 19.68 | 0.78 | 0.27 | 12.66 | 1.25 |
| <i>Pseudomonas aeruginosa</i> L1-FAA6                         | <i>Pseudomonadaceae, Proteobacteria</i>       | 0.12 | 0.02 | 0.04 | 0.00 | 0.09  | 0.00  | 0.03 | 0.00 | 0.00  | 0.00 |
| <i>Lactobacillus rhamnosus</i> L26-FAA6                       | <i>Lactobacillaceae, Firmicutes</i>           | 0.12 | 0.03 | 0.02 | 0.00 | 0.16  | 0.00  | 0.11 | 0.00 | 12.49 | 0.00 |
| <i>Bifidobacterium animalis</i> subsp. <i>lactis</i> L26-MRS4 | <i>Bifidobacteriaceae, Actinobacteria</i>     | 0.10 | 0.02 | 0.01 | 0.00 | 6.76  | 6.32  | 0.10 | 0.01 | 3.12  | 2.73 |
| <i>Bifidobacterium longum</i> subsp. <i>longum</i> L19-MRS1   | <i>Bifidobacteriaceae, Actinobacteria</i>     | 0.09 | 0.02 | 0.01 | 0.01 | 14.86 | 12.64 | 0.22 | 0.13 | 6.79  | 3.06 |
| Unknown <i>Bifidobacterium</i> LCR4                           | <i>Bifidobacteriaceae, Actinobacteria</i>     | 0.07 | 0.02 | 0.01 | 0.00 | 8.51  | 6.84  | 0.06 | 0.00 | 4.10  | 3.75 |
| <i>Bifidobacterium breve</i> LCR8                             | <i>Bifidobacteriaceae, Actinobacteria</i>     | 0.05 | 0.02 | 0.01 | 0.00 | 13.11 | 6.33  | 0.14 | 0.00 | 6.07  | 3.49 |
| <i>Bifidobacterium longum</i> subsp. <i>longum</i> L25-MRS8   | <i>Bifidobacteriaceae, Actinobacteria</i>     | 0.05 | 0.02 | 0.02 | 0.01 | 5.87  | 9.40  | 0.09 | 0.05 | 2.63  | 4.68 |
| <i>Bifidobacterium bifidum</i> L25-MRS2                       | <i>Bifidobacteriaceae, Actinobacteria</i>     | 0.05 | 0.02 | 0.01 | 0.01 | 1.32  | 1.72  | 0.06 | 0.07 | 0.34  | 0.90 |
| <i>Bifidobacterium dentium</i> LCR1                           | <i>Bifidobacteriaceae, Actinobacteria</i>     | 0.04 | 0.02 | 0.02 | 0.00 | 2.18  | 1.75  | 0.04 | 0.01 | 0.88  | 1.14 |
| [ <i>Clostridium</i> ] <i>innocuum</i> D2(9)                  | <i>Erysipelotrichaceae, Firmicutes</i>        | 0.03 | 0.03 | 0.01 | 0.00 | 0.26  | 0.00  | 0.04 | 0.00 | 0.10  | 0.00 |
| <i>Bifidobacterium adolescentis</i> DSM 20083 <sup>T</sup>    | <i>Bifidobacteriaceae, Actinobacteria</i>     | 0.02 | 0.02 | 0.01 | 0.00 | 1.85  | 2.31  | 0.02 | 0.01 | 0.92  | 1.57 |
| <i>Bifidobacterium animalis</i> subsp. <i>lactis</i> LCR26    | <i>Bifidobacteriaceae, Actinobacteria</i>     | 0.02 | 0.02 | 0.01 | 0.00 | 1.26  | 1.75  | 0.01 | 0.06 | 0.39  | 0.79 |
| <i>Actinomyces odontolyticus</i> L12-BSM1                     | <i>Actinomycetaceae, Actinobacteria</i>       | 0.02 | 0.02 | 0.01 | 0.00 | 0.82  | 0.00  | 0.00 | 0.00 | 0.02  | 0.00 |
| <i>Fusobacterium ulcerans</i> L9-FAA5                         | <i>Fusobacteriaceae, Fusobacteria</i>         | 0.02 | 0.02 | 0.02 | 0.00 | 0.14  | 1.46  | 0.07 | 0.00 | 0.00  | 0.10 |

|                                                        |                                           |      |      |      |      |      |      |      |      |      |      |
|--------------------------------------------------------|-------------------------------------------|------|------|------|------|------|------|------|------|------|------|
| <i>Bifidobacterium gallicum</i> DSM 20093 <sup>T</sup> | <i>Bifidobacteriaceae, Actinobacteria</i> | 0.01 | 0.01 | 0.01 | 0.00 | 0.31 | 0.33 | 0.02 | 0.00 | 0.06 | 0.43 |
| <i>Actinomyces viscosus</i> L6-BSM10                   | <i>Actinomycetaceae, Actinobacteria</i>   | 0.00 | 0.00 | 0.00 | 0.00 | 0.04 | 0.22 | 0.03 | 0.00 | 0.00 | 0.06 |

747 \*Species and isolates shown in bold produce large quantities of TMA from TMAO.

748

749

750 **Supplementary Table 3.** FISH data for the batch culture samples, with data presented as log<sub>10</sub>(number of bacteria/mL sample)

751

| System, time (h)* | EUB338 | Bac303 | Ato291 | Bif164 | Ent  | Bet42a | Prop853 | Lab158 | Fpra655 | Erec482 | Clit135 | Rbro/Rfla | Chis150 |
|-------------------|--------|--------|--------|--------|------|--------|---------|--------|---------|---------|---------|-----------|---------|
| A0                | 9.08   | 7.78   | 6.96   | 7.17   | 5.65 | 8.22   | 7.68    | 6.70   | 7.36    | 8.52    | 6.21    | 7.44      | 7.05    |
| A4                | 8.89   | 7.70   | 7.40   | 7.64   | 7.36 | 7.32   | 7.44    | 7.04   | 7.41    | 8.20    | 5.65    | 7.46      | 7.34    |
| A9                | 9.13   | 7.90   | 7.48   | 8.04   | 8.10 | 6.10   | 7.62    | 6.92   | 7.24    | 7.98    | 5.25    | 7.39      | 7.30    |
| B0                | 8.97   | 7.81   | 6.95   | 7.26   | 5.65 | 8.22   | 7.69    | 6.93   | 7.45    | 8.54    | 5.99    | 7.49      | 6.84    |
| B4                | 8.99   | 7.80   | 7.43   | 7.57   | 7.01 | 7.37   | 7.62    | 7.20   | 7.43    | 8.26    | 5.65    | 7.42      | 7.08    |
| B9                | 9.25   | 7.92   | 7.63   | 8.17   | 7.40 | 6.18   | 7.63    | 6.98   | 7.42    | 8.11    | 4.95    | 7.40      | 7.27    |
| C0                | 9.03   | 7.65   | 7.14   | 7.19   | 5.80 | 8.29   | 7.74    | 6.67   | 7.25    | 7.70    | 5.43    | 7.30      | 6.07    |
| C4                | 8.76   | 7.56   | 7.64   | 7.81   | 6.64 | 6.35   | 7.74    | 6.81   | 7.31    | 7.73    | 4.95    | 7.34      | 7.22    |
| C9                | 9.05   | 7.57   | 7.54   | 8.33   | 8.17 | 5.99   | 7.76    | 6.21   | 6.89    | 7.75    | 5.25    | 7.36      | 7.41    |
| D0                | 8.97   | 7.63   | 7.30   | 7.31   | 5.43 | 8.27   | 7.69    | 6.76   | 7.29    | 7.67    | 5.56    | 7.44      | 5.95    |
| D4                | 8.89   | 7.66   | 7.80   | 8.12   | 5.95 | 6.30   | 7.71    | 6.47   | 7.29    | 7.77    | 5.25    | 7.53      | 6.50    |
| D9                | 9.12   | 7.73   | 7.65   | 8.26   | 7.33 | 6.18   | 7.77    | 5.99   | 6.98    | 7.76    | 5.25    | 7.31      | 7.49    |
| E0                | 9.26   | 8.23   | 7.35   | 7.55   | 6.82 | 7.88   | 7.25    | 7.29   | 7.29    | 7.77    | 5.80    | 7.43      | 6.68    |
| E4                | 9.15   | 7.65   | 8.04   | 7.66   | 7.28 | 7.51   | 7.63    | 6.69   | 8.05    | 7.78    | 6.23    | 7.47      | 7.29    |
| E9                | 9.07   | 7.63   | 7.80   | 8.26   | 8.07 | 7.49   | 8.03    | 7.00   | 8.06    | 7.97    | 6.10    | 7.47      | 7.38    |
| F0                | 9.22   | 8.20   | 7.45   | 7.54   | 6.94 | 7.94   | 7.37    | 7.28   | 7.39    | 7.78    | 5.56    | 7.34      | 6.58    |
| F4                | 9.23   | 7.98   | 8.21   | 8.16   | 6.76 | 7.39   | 7.73    | 6.60   | 7.45    | 7.92    | 6.28    | 7.48      | 7.14    |
| F9                | 9.24   | 7.34   | 8.30   | 8.32   | 7.28 | 7.40   | 8.04    | 7.16   | 7.42    | 8.21    | 5.95    | 7.51      | 7.39    |

752 \*A prefix, donor 1 vessel containing TMAO; B prefix, donor 1 vessel without TMAO (negative control); C prefix, donor 2 vessel containing TMAO; D prefix, donor 2  
753 vessel without TMAO (negative control); E prefix, donor 3 vessel containing TMAO; F prefix, donor 3 vessel without TMAO (negative control).

754

755

756 **Supplementary Table 4.** NMR data for the batch culture samples, with concentrations of metabolites given in mM

757

| System, time (h) | TMA   | TMAO  | DMA  | Ethanol | Acetate | Lactate |
|------------------|-------|-------|------|---------|---------|---------|
| A0               | 0.03  | 89.45 | 0.05 | 0.44    | 1.63    | 1.44    |
| A4               | 0.77  | 92.3  | 0.45 | 0.59    | 6.68    | 3.69    |
| A9               | 5.46  | 71.4  | 0.86 | 1.76    | 26.51   | 13.61   |
| B0               | 0.03  | 0.58  | 0.04 | 0.31    | 1.51    | 1.42    |
| B4               | 0.03  | 0.56  | 0.03 | 0.92    | 9.79    | 4.53    |
| B9               | 0.06  | 0.21  | 0.05 | 2.14    | 33.5    | 12      |
| C0               | 0.02  | 80    | 0.04 | 0.4     | 0.89    | 1.44    |
| C4               | 0.16  | 81.1  | 0.19 | 0.55    | 4.61    | 2.96    |
| C9               | 6.33  | 76.83 | 0.4  | 2.07    | 33.7    | 15.51   |
| D0               | 0.03  | 0.62  | 0.05 | 0.31    | 0.97    | 1.5     |
| D4               | 0.03  | 0.55  | 0.03 | 0.69    | 6.41    | 3.74    |
| D9               | 0.06  | 0.2   | 0.04 | 2.01    | 32.4    | 13.94   |
| E0               | 0.03  | 79.6  | 0.05 | 0.41    | 1.76    | 1.4     |
| E4               | 1.61  | 80    | 0.61 | 1.52    | 17.5    | 7.38    |
| E9               | 10.81 | 70.8  | 1.4  | 2.5     | 38.5    | 10.7    |
| F0               | 0.03  | 0.58  | 0.05 | 0.27    | 1.77    | 1.37    |
| F4               | 0.05  | 0.23  | 0.05 | 2.78    | 29.5    | 9.75    |
| F9               | 0.08  | 0.05  | 0.16 | 2.76    | 38.3    | 3.95    |

758 \*A prefix, donor 1 vessel containing TMAO; B prefix, donor 1 vessel without TMAO (negative control); C prefix, donor 2 vessel containing TMAO; D prefix, donor 2  
759 vessel without TMAO (negative control); E prefix, donor 3 vessel containing TMAO; F prefix, donor 3 vessel without TMAO (negative control).

760

761 **Supplementary Table 5.** Spearman correlation (corrected for ties) and adjusted *P* values (Benjamini–Hochberg) for FISH and metabolite data for batch culture samples

762

| Probe           | Spearman correlation values* |                       |                       |                       |                       |                       |
|-----------------|------------------------------|-----------------------|-----------------------|-----------------------|-----------------------|-----------------------|
|                 | Acetate                      | DMA                   | Ethanol               | Lactate               | TMA                   | TMAO                  |
| Eub338          | 0.37                         | 0.14                  | 0.38                  | 0.15                  | 0.06                  | -0.38                 |
| Bac303          | -0.18                        | -0.30                 | -0.17                 | -0.21                 | -0.36                 | -0.16                 |
| Ato291          | 0.78                         | 0.33                  | 0.79                  | 0.60                  | 0.57                  | -0.46                 |
| Bifl64          | 0.93                         | 0.37                  | 0.87                  | 0.81                  | 0.72                  | -0.48                 |
| Ent             | 0.82                         | 0.59                  | 0.65                  | 0.75                  | 0.81                  | -0.09                 |
| Bet42a          | -0.69                        | -0.22                 | -0.62                 | -0.78                 | -0.62                 | 0.24                  |
| Prop853         | 0.40                         | 0.01                  | 0.47                  | 0.40                  | 0.24                  | -0.32                 |
| Lab158          | -0.05                        | 0.14                  | -0.21                 | -0.43                 | -0.08                 | 0.02                  |
| Fpra655         | 0.18                         | 0.17                  | 0.19                  | -0.10                 | 0.12                  | -0.12                 |
| Erec482         | 0.20                         | 0.03                  | 0.20                  | -0.01                 | 0.06                  | -0.13                 |
| Clit135         | -0.03                        | 0.13                  | 0.07                  | -0.24                 | -0.06                 | 0.10                  |
| Rbro730/Rfla729 | 0.15                         | 0.04                  | 0.24                  | -0.07                 | 0.05                  | -0.22                 |
| Chis150         | 0.85                         | 0.56                  | 0.74                  | 0.76                  | 0.85                  | -0.13                 |
| Probe           | Adjusted <i>P</i> values     |                       |                       |                       |                       |                       |
|                 | Acetate                      | DMA                   | Ethanol               | Lactate               | TMA                   | TMAO                  |
| Eub338          | $2.51 \times 10^{-1}$        | $7.05 \times 10^{-1}$ | $2.51 \times 10^{-1}$ | $7.05 \times 10^{-1}$ | $8.05 \times 10^{-1}$ | $2.51 \times 10^{-1}$ |
| Bac303          | $5.23 \times 10^{-1}$        | $5.23 \times 10^{-1}$ | $5.23 \times 10^{-1}$ | $5.23 \times 10^{-1}$ | $5.23 \times 10^{-1}$ | $5.23 \times 10^{-1}$ |
| Ato291          | $3.88 \times 10^{-4}$        | $1.84 \times 10^{-1}$ | $3.88 \times 10^{-4}$ | $1.67 \times 10^{-2}$ | $1.99 \times 10^{-2}$ | $6.89 \times 10^{-2}$ |
| Bifl64          | $1.13 \times 10^{-7}$        | $1.33 \times 10^{-1}$ | $8.41 \times 10^{-6}$ | $8.01 \times 10^{-5}$ | $1.04 \times 10^{-3}$ | $5.55 \times 10^{-2}$ |
| Ent             | $1.63 \times 10^{-4}$        | $1.26 \times 10^{-2}$ | $5.32 \times 10^{-3}$ | $6.66 \times 10^{-4}$ | $1.63 \times 10^{-4}$ | $7.15 \times 10^{-1}$ |
| Bet42a          | $5.06 \times 10^{-3}$        | $3.71 \times 10^{-1}$ | $9.87 \times 10^{-3}$ | $7.82 \times 10^{-4}$ | $9.87 \times 10^{-3}$ | $3.71 \times 10^{-1}$ |
| Prop853         | $2.09 \times 10^{-1}$        | $9.64 \times 10^{-1}$ | $2.09 \times 10^{-1}$ | $2.09 \times 10^{-1}$ | $4.15 \times 10^{-1}$ | $3.02 \times 10^{-1}$ |
| Lab158          | $9.35 \times 10^{-1}$        | $9.35 \times 10^{-1}$ | $9.35 \times 10^{-1}$ | $4.38 \times 10^{-1}$ | $9.35 \times 10^{-1}$ | $9.35 \times 10^{-1}$ |
| Fpra655         | $6.83 \times 10^{-1}$        | $6.83 \times 10^{-1}$ | $6.83 \times 10^{-1}$ | $6.83 \times 10^{-1}$ | $6.83 \times 10^{-1}$ | $6.83 \times 10^{-1}$ |
| Erec482         | $9.71 \times 10^{-1}$        | $9.71 \times 10^{-1}$ | $9.71 \times 10^{-1}$ | $9.71 \times 10^{-1}$ | $9.71 \times 10^{-1}$ | $9.71 \times 10^{-1}$ |
| Clit135         | $9.09 \times 10^{-1}$        | $9.09 \times 10^{-1}$ | $9.09 \times 10^{-1}$ | $9.09 \times 10^{-1}$ | $9.09 \times 10^{-1}$ | $9.09 \times 10^{-1}$ |
| Rbro730/Rfla729 | $8.65 \times 10^{-1}$        | $8.65 \times 10^{-1}$ | $8.65 \times 10^{-1}$ | $8.65 \times 10^{-1}$ | $8.65 \times 10^{-1}$ | $8.65 \times 10^{-1}$ |
| Chis150         | $2.80 \times 10^{-5}$        | $2.00 \times 10^{-2}$ | $6.10 \times 10^{-4}$ | $5.37 \times 10^{-4}$ | $2.80 \times 10^{-5}$ | $6.21 \times 10^{-1}$ |

763 \*Green cells show statistically significant results.
